# Supplementary material for: Genome-Wide Identification and Characterization of the OFP Gene Family in the Wild Strawberry Fragaria vesca
Source: MDPI journal article supplement (doi:10.3390/agronomy14030569), 2024-03-12
Supplement: s1 [file s1]

## The protein sequences of OFP family in *Fragaria vesca*

### >FvOFP1 FvH4\_1g04770.t1

MHLYTPPTLLFPKPKSSSVLILSLKLLCFSNLCTFLSKMENRFKLKLSRMFHKASLGTCSRSLSDVIEKAVFLPQNCN  
TSTDSPPKPAPPPPKPFAICRPKCSDDPKQQPINHRCVISRSNTDMLPRRKIFERRSPFVKSEIPPNPLFSNSNPFY  
EVHESHFRQRKKRGSKKKKRSQKSDISSLDSNHYYHNGWSSSEDEEKEDETDTLFSSNHTSDSSGSRRLRSSR  
GKAQSFGRRRGSSVCSEVGLMPLQGKVKDSFAVVKSSDPYNDFRTSMVEMIVEKQIFSGKDLEHLLQCFLKLNSPHHH  
RVIIIEVFTEIWEALFSNLGT\*

### >FvOFP2 FvH4\_1g09620.t1

MVEAREHQTEDESVKVKSNEWFLHELLLCYLALNPKSTHKFIIGAFSDLLVSLLPSPKDPEFTAGVCEISRCS\*

### >FvOFP3 FvH4\_1g13640.t1

MAKRFRRLIRSVIPSFQSCRKDPSSLPSNPVPSFLRPSPLNHHLSTPPSKPHYSSSIKRHVSSAFGCGFGTKPTLSD  
DDNGSLPPEVFEWEREDKWHVAMVDEDKTPRRKIYTSSASADSERDDAVSLSFSPPPPPSSAEKKKKQRLRKKKT  
TSRMIRFSTSSAESGLFSDDEENETLFSFSTDSSADIFTRHLATIRETPRRRKKIKSKAKRSVSRSTSGEFESRPLSV  
FQRLIPCSDVGKVRSEFAVVKKSEDPYEDFKRSMEMILEKQMFHEKELEQLLHCFLSLNAREHHRVIVQAFSEIWEGL  
FCGSARSSGARVSRL\*

### >FvOFP4 FvH4\_2g23310.t1

MPSTLGRNLNLCFTKIKRPLLTLQSPVDDHRSPPTTTSTVSTAMSSSTVIKNFNSLYDGDHAFDSTATSSSIKSSDL  
STTETENDTDTAAADFATVFASQRFFFSPPGRSNSIVDQSSSSSSSDLHAPFKHNSVAVPTYSPDPYLDFRSMQEM  
VEAREHQTEDESVKVKSNEWFLHELLLCYLALNPKSTHKFIIGAFSDLLVSLLPSPKDPEFTAGVCEISRC\*

### >FvOFP5 FvH4\_3g01350.t1

MKSSRQHKKQPQLNRRAPIRALCCSSCRLSVSSSSEQEVESSSTSDRNRYPSISSIAHAMVQERLDQVIRERQEEEA  
AHVDRRRRKNKAIYDDRAQGTGTFVVMVAMEKCSYDPREDFRESMEEMIMAKRIECPKDLRSLNYYVSMNSEEYHEI  
ILEVFHEVCSDLFLCKCH\*

### >FvOFP6 FvH4\_3g07180.t1

MKWGSSRNKKPPPSFASSTTSKPSLISHVPSSWLSKFKQKTGNSEPKPGKVNQKGKRNPSPLSSSPRIAREGGGRF  
YGGDDGDDGYWRLSFGEDSVEGEKKSRGVLRSVRYESEEFEARPSKVTGMSKGGNAEERKLKRGNEGVTGKKRLELKG  
EAEEPEERSKKTGEEDDVLEMLAARIILTKEKDSNKHGLTSGARKYRYASSNLKTIEEEVSEEKPTSDWQKLKEMKIQE  
VMAKSEKHRKSVYISRDLQRKSRPKRSNKVRVCSPTASRVEICKIKALQDMAKAKKAERKVKVVRTGLDSFAVVKC  
SFDPPQDFRDSMVEMIVEKKLTRPDDLEELLACYLTLNSDEYHDLIIKVFRQVWFDLNQTYFGSELQNDQCCND\*

### >FvOFP7 FvH4\_3g25970.t1

MSSTKTKFLKTLVTSNIRGCGCRPKLSDVYEPTAKPKIPICKINSNHQIPHSSSSCDMRNGSFTVDEDEDQCTST  
TISFNNDSTVSSSQPSDAEIHCSNKSPPIPPQTKIDNSIAVVKSDNPYQDFRRSMLQMIVEKEIYSKEELQELLSC  
FLELNSRHHDVIIQAFTEIWNGDLVDIARKRSVRVNPRCGTCEDHKPCEALN\*

### >FvOFP8 FvH4\_3g40310.t1

MGNYRFRADMIPNAWFYKLTMSKTRKHNTTSPKKKPPTSSFPQRTTHLSQTRYSYIITDQQPNRDERFFYNSPTC  
PKGSDTNFPEQPRRSSTKRSRRKAVYRPSPKKHVISSSVSSGHCSCQCHASTPESLDYFGSSSSERNSTETHDFHELIP  
SEFESDQLGASEFGSYSCRVSSTSDTIIDKKKEGSTNKVHDFRDMISELELPPILTKPTKLDDRSKAESTKFRKSTS

SKLKETKGHQSLSVKIVKEERSSSRIQKDQKTAAPYVRNSSASPTGIRLRGNSPRLASKKLQQPFGSKKSVSKNRGGIS  
DSFAVVKSSLDPQRDFKDSMREMIMENNIKESKDLEDLLACYLSLNSREYHDLIVKA FEQIWFDMARIKI\*

>FvOFP9 FvH4\_4g15660.t1

MSKLPWKKNLHLCLPNFKCLPLITQNPPQPSDHDHPHPNPPLMITNNINSLYHHDSNSSDQSTSKSLTASDDFFYSSSS  
DSEAATDSPPDFATVFASQRFFFSSPGRSNSIVESPDTKPNCNDSFVTRGVTVAKYSSNPYLD FRKSMEEMLEARDRDH  
IDNKDRNHNVVDVLKSDLDYLHELLLCYLQLNPGDAHKDIISAFTDLVICILSANPAASTSSSADDDHIKEEKEEIQRQ  
CAS\*

>FvOFP10 FvH4\_6g10140.t1

MGKYKFRLSDMIPNAWFYKDKMSKTRKNQSSNSHPKKRNQPPPSTFASSAKPTSPA KPKQVTHHHCHHSRKSYYFT  
RELNNSTGENRPLCNTPVNPKVSTTNLTHEPPRKSSIQKQRKSSNSKLAMSTSSSVSAGCRASIESVWTKSDSLPEEQ  
WSTSSSLDSSLEFHHTDSLEFRCDRILATETFDGMNSMTSSNEKDIIIDVNSSEKKKLD SFSDELPRITKPE SFN  
EMVCEVKKKKKENKEQQPIKSRKSSHGSENNKEHRTSSVRRVTSSTSPGVKLRTNSPRIANRKINQAQVGRRSLSSNS  
SKRRSLSESFAIVKSSFD PQRDFRESMIEMIMENNIKASKDLEDLLACYLSLNANEYHELIIKVFKQIWFDLTDIQSKG  
FSGSSFFSTPILEKLYLWR\*

>FvOFP11 FvH4\_6g19870.t1

MKLLPSSLFKNTAPAPEPKSSSSSWPWPSCTQTRTISFRIPGNDMFKTINSAYFDTNTPESFFTN SSEGCAFSTTVSE  
EDSSGGGGDPIETVINKGLRSERLFFDGETSSILDKDSIKAREEEEEEEEDDDGVDELAGDDNIPKESVALSMD S  
PDPYVDFRKSMEEMVEAHGLKDEHLEELLCWYLRVNGKSNHGYIVGAFVDLLVGLAFSTSI PPPSCSCSEYSPSTPLS  
FYTSTTSCSSSTSTPCVSSIGPEDGSEMSTSTIPYLSLLEAEEEEINEEDDDDDGASS\*

>FvOFP12 FvH4\_6g19871.t1

MSLP SRETISLSLKRKTRAVIIASTGTPQESSGELTCTLLYTHSHHSPHPSSSSQLSL FFFFFFFF SFFCFTPSPT  
MPTITRKKLLNTVAVDIGCSSCRRPRLFHMFRNKA KAPVTTKFGGRKQSHHNYSSASSSYNKDSSTTTT FSPNTDDYAS  
FSDHETVAKTATPVKGFGRVGGESVAVEKDSGDPYLD FRHSMLQMILENEIYSKDDLRELLNCF LQLNAPCNHGIIIRA  
FTDIWNGVFSVRSSAATMQLRLARKSRDY\*

>FvOFP13 FvH4\_6g31210.t1

MTKKLQKRLQDYLT KIKKPSPALIPISKKWMRTCKHPKTL SFAINNTETTQDKDDAATLS DIDEFLFENFRSLYL RD  
DDQGADTTDENERKREEKTLEMKGHEKESANEPFWDKPLHLKKRSPDQHETQNQDGFLFESPRLNIDPPAADLCSSHR  
FSVSPGRLSSSVRTSTTTTTTSEDAGSSMTSTRTLNVDSP TTSNNDHHVALPTDCISVLMYSPNPGYEFKRSMHD  
MVEARLRNNAKVDFMEELLFCYLNLNKKKSHRFILSAFADLVDMRQSDTVLERSRKL\*

>FvOFP14 FvH4\_7g33090.t1

MDHVTEEQNRRRRRKEILQSRSGKFSFSARLPDDVHG VFAGSMCLVKYTTDPLLDIRESILEMLQYA QGVCDWNDVEEL  
VYCYISLNSSEVHELVGQAFLSLCSS\*
