# Supplementary material for: Genome-Wide Identification and Characterization of the OFP Gene Family in the Wild Strawberry Fragaria vesca
Source: MDPI journal article supplement (doi:10.3390/agronomy14030569), 2024-03-12
Supplement: s1 [file s1]

## ***Arabidopsis thaliana***

>AtOFP1 At5g01840

MGNNYRFKLSELIPNAWFYKLRDMSKSKKKNLQSQPNSTTSKKKHHAVPTPTSTTPLSP  
RPPRRPSHSSKAPPSHPPRKSSGNRLRHRATVDSKSSTTSGDSTTTETGSFSPDFRSD  
QVLLPDESLTGSWHSPCSSKLSKTATFTPPPELELRPIITKTAATARKTAVNSPAGVRLRM  
RSPRISVSSSARRSGSSARRSRAVVKASVDPKRDFKESMEEMIAENKIRATKDLEELLAC  
YLCLNSDEYHAIINVKQIWLDLNLPPPHSK\*

>AtOFP2 At2g30400

MGNYKFRISEMLPNAWFHKLKDVTKHSPKNKASSSSSNTCSKKKPSSDSLQHSYFS  
NSLVANNPPHHNSPRNSLHTKKMSKRKTLYKPSLKPLTPPPLLVSASFNKSKindQDSSY  
SLFPAIETSPESFVYSFYEEDDDDDEFVEFSNFKINTKNKAFTKQKVVIDSVEKACTASKPI  
KKPQKSHLSVKISRDEDDNEYKAEKKYQRQVSSGRKPSAGINLKRVNSPRIQLSGTRRS  
TSRRSESKQDVLESFAVMKRSVDPKKDFRESMIEMIEENNIRASKDLEDLLACYLTLPNK  
EYHDLIIHVFEQIWLQLTKTK\*

>AtOFP3 At5g58360

MKQKMGTHTKFRFSDMMPHSWLYKLKGMSRSSRKHHLSPPKHLSSADASSSRKLRDPL  
RRLSSTAHPQASNSPPKSSSFKRKIKRKTIVYKPSSRLKLSTSSSLNHRSKSSSSANAIS  
DSAVGSFLDRVSSPSDQNFVHDPEPHSSIDIKDELSVRKLDDVPEDPSVSPNLSPETAKE  
PPFEMMTQQKLKKPKAHSSGIKPTKIVRKKKKERTSQVSKKKGVVKSFAIVLSSVDPEK  
DFRESMVEMIMENKMQREQDLEDLLACYLSLNSSEYHDVIIKAFENTWLHLTQGLSISL\*

>AtOFP4 At1g06920

MRNYKLRLSVMSPSEWFHKLKNMTKPRKKHSLPLYSINTTKRKPSSESkslPYSSTSY  
FFNRSRSRTSFESRILQISPRNSLHNIQSKRKTIVYKPSPSSSIVSAGFNKTFHQSHDSL  
ASSNLKVISSEDDIIDMNNRDFKKKTFKEITKFDSTEKACRASNRKETHIPHHLSVKVSK  
EKEDEEEDACRTKKKHQKTLVSSGRRSSAKSPRIKLARSPRIQVSPRRSKSRSQNKQI  
LDSFAVIKSSIDPSKDFRESMVEMIAENNI RTSNDMEDLLVCYLTLNPKEYHDLIIKV FVQV  
WLEVINSTFASK\*

>AtOFP5 At4g18830

MMRWGRKKPVSSSSSSGLSRALPVSWFSKLSGSSDLKPAKEKKQDEKASQNISVKTS  
SSTTRRSDIHENSkrfQRVsVEKENSATRSADKESNEKFEEIMSSVRKKVRDFQKETCG  
FLEVEAMDRDNGTVILTPRIQVNRDKQRCERRDQRLLEQKPKRSEQDAGVKVKKPARR  
TGTGGYSREDSVILGHTITKPAHQWEKLKEVKLREVKLKADQQRKSLYLKRELNRIgTKE  
NNKVRVFSpraseKCRVKAIEDLKKAKQRAREHELLIETADGGMENESFAVVKCSSDPQ  
KDFRDSMIEMIMENGINHPEELKELLVCYLRLNTDEYHDMIISVFQQVHNDFNH\*

>AtOFP6 At3g52525

MATKSKKKILKTVSVVDISCGNCIKPTFASIFNFFSKKPKRPSSTYRHCHSSISSATPSSTP  
LATASVAVEKSDDPYLDfrQsMLQMIENQIYSKDELRELLQCFLSLNSHYHHGIIVRAF  
SEIWEDVSSAAASAVEASPLITRHVSRASRDYYNYY\*

>AtOFP7 At2g18500

MTKRFLKISRILSFKSCRLKDPSSLPFNPVSSSLRRTSPLVNSSADVTTVPQRRRSSFR  
LHVLTVFGCGRSSTPLDVLNRNSPVLSPPTPTFQWESEKWHVIAQVTEEEYETPRR  
KIYNGGSEKDNRRRLKKKEKSNSRRRGSISSAEEETDRESLLPSSTNLSPEYSSSELPR  
VTRRPRQLLKKAVIEEESESSPPSPARLSSFVQRLMPCTMAAAVMVEGVAVVKKSED  
PYEDFKGSMEMIVEKKMFEVAELEQLLSCFLSLNAKRHHRAIVRAFSEIWVALFSGGS  
GGRRSSSFSSVRLSDYDEC\*

>AtOFP8 At5g19650

MEKRMKLRVSRIVRSSLSSCRPRDLYDVVETCAVTSKATSSERFFVTKAKTKTPSRPKS  
HASSCPRASPIFPNPFYEESSFRDLRKKVKTNRKQRSQFGSDPLFASRFKSTGSWY  
WSCSEEEDEGDKEESEDSDTLFSSRSFSSDSSKAESFAVVKKSKDPYEDFRTSMVE  
MIVERQIFAPAEQLQLQCFLSLNSRQHHKVIVQVFLEIYATLFSP\*

>AtOFP9 At4G04030

MLARAPAPLLLLPSPNPPPCALPQDLTSLVSPSEPPDPPDPPDYLVGASNSFLSILLRSS  
DLGSDLVQALSPLDLGFALRSITAVCSSWYQVFPLACLELWFSIPHLSHPLVTLKGFVSL  
KGSNFFEFFTFWNMPFILQFPHHEDVMISTSFRLVLPQYEAVMILLKLKFLPHYEDVL  
FSIGLRIQLLLPQYEVGLILYKLRLLLPHYEDVIQKLWLRAIHVIVSLVWFLEISRRIKEKTYD  
VLTRNDLGSWTPDLFIEKWWFSQPHTSPKLRFFSHLVGSRS\*

>AtOFP10 At5g22240

MLNLQAKLNEKKVPLLTNFPTPTSSLNNLNLFSPLVKKKMSFKKMMKYILKTIFKPIFMA  
CGCGSTVPPSSHSHYTPGPPVSPTVLRSPCPKIDESVAMAKESINPFEDYKKSMNQMI  
ERYIETESELKELLRCFLDINPSPQHNLIVRAFDVCSHLQPPHRRGKSLGRLRLRYVN  
NPLDNNDDDSHQTSSK\*

>AtOFP11 At4g14860

MSNFLRKHLHLCFSSSGGLSPSIPSSPIIVSNHNAQSHPHHTPSIFINNFSLYDQLSVSS  
PLHRRHSENPAAGVFSTNRREEEEDETTTSVSKLLSGGTAIMKHIESPDYRDFGRSM  
REMVEARDLTRDVVADREYLHELLFCYLYLNPKHTHRFIVSAFADTLLWLLSPSPSPEHF  
LS\*

>AtOFP12 At1g05420

MPRVMWKNFHLCFPSNLTKPSSSPSGATSDDPNRPSILLINNFNLLYDDSSAAHRRLSK  
PLIHDVEPSSTFTASTSTAANSSSSSASYDDSDNYGFAPDDSDPPDLTAVLASRRFFFS  
SPGCSNSITDSPDLRCRDNYDTATRLTGGTAVKHVYQSPDPYNDFRRSMQEMIDAVTN  
AGDLRRYEFLHELLLSYLSLNAADTHKFIIRAFADILVSLSDGHRIS\*

>AtOFP13 At5g04820

MGKKKMKLSSLFKGGAGGLAVPLCYNAKTL SFRVGDDMIKTVNSVFFDHHHNNNNGG  
DLLEAETPESWFTNSSETASHSTESDQDLDAESLEMVVRGVVRSERLFFDPGVTSSILE  
EIEEKS KSDLKSKETVAVGEDRSTPIEEISVAVAMESEDPYGDFRRSMEEEMVTSHGELAK

DWESLESLAWYLRMNGRKSHGVIVSAFVDLLSGLSDSGAGITSASVSDSARYSTAVSS  
LPSSPVYSLSQGQTEIQEEERRSC\*

>AtOFP14 At1g79960

MPNPLQKSLHGYLSKIKKETGKLQLSSSHSFSSSKNWVLGKHPKLSFSFKHRRRSSKT  
RFSKEEPVYHQDSAHAATLSDIDRFLEENFKSLCIRDDQEDDQHARVTKNKEKRESSS  
DDSDDDDDDDDYRHRFERTWGHAVYDSPKQPPDLLRTERLSPPPGSSEGRPSMETTS  
TSSERQSRSTLVLPENCIAVLRYTDEPQEDFRQSMVEMMESKLGMRSEVDWDLMEEL  
LFCYLDLNDKKSHKFILSAFVDLIIALREKEKRITRKGHVRSLSLTRAARDRLRKMIMSDN\*

>AtOFP15 At2g36050

MKLPFLNKNHSTSSYSSNSSSSSSWPWPSCNQNPCTLFRATITFTNPIHDQDDDELDDL  
DPPEITDSVENVIKGLRSSERLIFESKGETNSILEEATSKREEEDEEEGFMLFSLESDDPY  
SDFKRSMEEMVEAHALHHDWKSLEKLLLQFLKVNAKTSHRYIFAAFVDLLMNLALDTKK  
AIINNDISKDDGVASASRAAAAGEASTSCCNSMTLGESPSSPLSFYTSCSSSSSSDETSS  
MSVRFLPLSSLLEMDEKTKEILV\*

>AtOFP16 At2g32100

MPKILWKSLHLCFPSNLTKCYSSPCIPPSSADPDGIIQPNRPSIVLLNNFNLLYHNDNHHH  
PHRVIDLPSSSTTTTPAATSSSSTSSYESDISPDVSAAFASRRFFFSSPGRSNAITDSPEP  
RSREFSDNYDDATITSTKKKKKKVYDNSVTTTTTRLISGGTAVTQHVDSPDPLTDFRRSM  
QEMIDAAIDAGELSRDPNDGYDFLDELLLTYSLNPADTHKFVIRAFSDILVSLSEERRIC  
\*

>AtOFP17 At2g30395

MRVKATLINFKSKLSKSCNRFVSLFRFRVKRPVFIRPLRARHGNVKPRHQHHHSKKPICS  
CLCFLNSSKNHKMSNAKHRSSSFVNDDDYSKFMQSPLTPATAKKLFTSPITTPYSSRTR  
KSLNARDTFEDNAVEDACRSFENYLIHLIVEEGKIDDLMDIEELLFCWKNLKSPVFIELVSR  
FYGELCRDLFSGE\*

>AtOFP18 At3g52540

MVRKMKLPFLNKNTSSSSFSSNSSSSSSSSWPWPSSHQQNLKTISSKASFIVNKP KD VYE  
PEPPPRSFSSSPSSSSSYSSFSSTSHAIENPPEIESIENVIKGLKSSKRLIFERRGTSNSILE  
EATKRDDHEEEEDGLMLLSLESNDPYTDFKNSMEKMVEVHVLHHDWISLEKLLFWFLKV  
NVKASHRYIFAAFVDLVNLAVGPSKDVAGEPNSDVVVEDSLSSSWPVSLYSSSDENSS  
TSVRFLPETSIGEKGRDVCCLSSLFELEEKIKDNIDPNDYVSS\*

## ***Solanum lycopersicum***

>SIOFP1 Solyc02g085500

MGKSLKLRFSRVIASFNSCRSKNPSSLPQNPFFPHKLTSTKHISPDFPLIDQNQNQNHR  
NYVPESTMISVGCCRSEFKWEKEEFHVSSSFVSEEEEEEEEEINLALRPPLTPPRFSRI  
VVEKKKKKKQQRVKTKTKSRIIRMSTSSADEYSGILSGTNTDWDNNEEETESLVSSSR  
CYDFSDDSDSTDFNPHLETICETTTMRRRHKRNANTKRRSIKQSRPSFSSSKGRRSSVS  
TSSDSELPARLSVFKKLIPCSVDGKVKESFAIVKKSQDPY\*

>SIOFP2 Solyc10g076180

MGNRYFRLSDMMPNAWFYKLKDMAKSSSRHSHTTSSSNLQLDKKRQPHNNLGCQR  
KSYYSISRLTITSPISSNSPKLDHNVHITEPSRKSYYKKRRSTNFRRRNSPKPVNSSASVES  
VWTKPDSTPEQYPNSSSSSSSSSPSSILPHKSNPIASISPSCDCRTDYTNQNSANLDPG  
VHSVSKIDLPRITKPEKFNEKIQEKQRIVKQEQRIVRRVSTNGVKLRTNSPRITTTTTNSR  
KSVSSKRTSVTTDSFAVVKSSRNPKQDFRESMVEMIIENNITTSKDLEELLACYLSLNSDE  
YHDIHKVFKQIWFEITEIRLK\*

>SIOFP3 Solyc02g072030

MKWGKKKPSSSLMTHVFPVSWLSKFKQKKVCRSEDQEGAKMRKVDLRTNVCLKQGRF  
YEDDPYWRISFSEENHPQNPLWCGECDQNSKSSLGEENHKFNDMVSRISEKPKNEAE  
FSNRKRNSVKDEKLRLSRKALEERIAENAREEVTEKDIFEIEPEDEKVMKRGKEKPTAY  
KSRKARSLSYNDSSPNSVEESCMFTSLNLEEEADALSEEEFESECLKIKEMSEKSGCQ  
QRKSVYINQKRRRKHGKIVRAYSPRTAKMECRIKALEDMMKARMKTRHETKESFTGDRT  
VFDSYAIMKSSFDPFSDFRDSMIEMITQRGKSSEELEELLACYLTLCDEYHDIHKVFRQ  
VWFELNQINIGEELQKCCCSDE\*

>SIOFP4 Solyc08g068170

MDNHIVNKFSRLFPSSFTSCQFRNIPDVVENSFIISKNSKVFHNNAVGVSSRTNSSIKTQE  
SKSNKNTLLKSSSSNSGWFSSEGENDETEDAFFSLSSGYFSDSFRRKPDESCRKMYN  
QKSSEMGRCYSELSVNSVSRVGSNLGESKWWKSRNGTSKTEQNGGKVSRTLRETGGT  
SRKKYGSEMSHCSATLSRTNGRVGSNLDESKWWKSINGLDFASAKTEQNRGKTSRTAR  
KTANQNDSEMSPSSSALWRTNERVHSNLDESKWWKSINELDFTTSKTEQNRGKAESKW  
VKSINELDFASSNTEQNRGKPIRTARKTANQNDSEMSHSSSELSMINEQVNSNLDELKR  
VKSINELDFTISKTEQNRVNTSRKTPPRSSRRTLRTTPVEKFDYYSDFTSNTRRKTTKC  
RRKIKKSSSTSSDEMGRKIVIEGRIEESIAVEKNTNDPHNDFRTSMLEMIVEKQIFGLKDL  
QRLHCFSLNSPSFHKIIFEVFAEIFETLFH\*

>SIOFP5 Solyc04g080210

MTRRFKLKLSMPSFRFCRPPKASFLPKSPMPLSLYKFSPANILDNSPVVPPSTPHHPYI  
LRKAHNLAASKTYNSPSSEYSDPDNNMRRGESRKSRLNMSFSSVDSGWFSFNSECCD  
EKPNDETESFMSSPSFESSFDVDHGIDPLSGIRRKNNNNNTKVRRLRRYLSNSLKDSMM  
PCMADGKVNESFAIVKRSVDPYDDFKNSMKEMIMEKEMFEAEDLEQLLLCFLSLNSRHH  
HAIIVEAFTEIWEELFGKSSKSMCLKLPRFQ\*

>SIOFP6 Solyc01g00780

MSTHRRRIILSNVTVKLGCSSSCIRPKLSSIFHPKPRKSPKSQTQNKNYSSNYSSCSSWDT  
TTTTFSPNSDSTTNESSDFKTSKAVQGFGRIGGESVAVEKDSDDPYLDFRQSMLQMLE  
KEIYSKDDLKELLNCFQLNSPYYHGIIVRAFTEIWNGVFSLRPGVAGASSPFLHGGSHV  
TYR\*

>SIOFP7 Solyc12g007080

MPSKSTFDQWRTQKFFTSSSIGLLSQYDFGYKWKMPSSITNFSS\*

>SIOFP8 Solyc05g055220

MAKKLKISSIFKKKELGLATWQWPSCTHSKTLSFRGDDNIFKTINSVFFDPFDGIETPQSY  
STNSSLDTNSISIESHEEIIKGARSERLFFEQVATSSIFQEPQEENQENDLPFKESVILAME  
SKDPYLDFFKKSMKEMVESQGIKDWDNLQELLACYLKLNGEVNHGFVLGAFVDLLVELVI  
PTTPSTNSDNSITSYSSVASSSFSCPSSPLSSLGHKETEEQENAKVS\*

>SIOFP9 Solyc09g018200

MGNRYFKLSDMVTSSWFYKLKDMAKSRTQIKRKQTSSSTSSSSFSIFYSSSNVQQHHR  
KSYFFSRTLSPNPHQSNVTPMKSSKKRKNTRRNTPKFVNSPKSMILSPSHRRCNDHIFD  
SVSKIDLPPILTKPNKKEEKTELKFLTvkTEQSTSPKRRISVSSSSTGVKLRTKSPRIISRR  
SVGEKSYAVVKSSKNPQKDFKESMVEMIVKNNIKTSKDLEELLACYLLLNSHHYHHLITV  
FKQIWFDLQLK\*

>SIOFP10 Solyc10g082050

MSTTKKRVLNRNVTVKLGCSSSCIRPKFSSIFHPKPRRHHSADSAAVFNHHKTPNNKYSF  
SNSTITTATTFSPSPTPSPAHYSSDAERAVQGFGRIGGESVAVEKDSDDPYVDFRQSM  
LQMLEKEIYSKDELRELLNCFQLNSPYYHGIIVRAFTEIWHCVFSVNPGVTGAESPFL\*

>SIOFP11 Solyc11g068780

MSSKNKKIWNCITSNGTAGCGCSKPKLSEIIQPKPKPRPEPEPNAHSSSTSNSDSPSPTI  
MPAKIVGSVAVVKDSDDPFGDFRRSMLQMIMEKEIYSYDDLNELLNCFQLNSPSHHDIIL  
QAFMEIWNNGKNYIAN\*

>SIOFP12 Solyc06g082460

MGNHKFKFSDMMPNTWIFYKLKDMSKTKNHKSPFSSSSTNKSQYSQPRSSFSYTRRSI  
RVDKIYNHSYNFLDQPRRSSSSSSSKKSKRKTIIKPSPKHIPSSVTNYVSVSNKLNTSS  
SVYSTEEDKFPELDFLNSPSSEFDSVDSQTFNELPSTWPNSCNCHFTSSATDIIIDVNDK  
ALSNEFHNLTTTEYAEFSDIDQLPPIFTKASNSIKNIQDENVKAQREKEPKNRVGSPPVSRK  
HYSSSSGVKLRTNSTKVANKRNSVSSSKRRSKTKKESCSASRGTSFAIVKASIDPEKDF  
RESMVEMVVENNIRASKELLENLLACYLSLNSNEYHDLIIKAFAQEIQWFDLSDLHL\*

>SIOFP13 Solyc11g006670

MGKKMNLGSWQWPSCTHSKTQSFRANHIFKTINSIFLDPSNTDHHHHGVVEIETTPES  
WFTNSSSESASFSTESEETGEPLMELIIKGVRSERLFFEPNCTSSSILEHQDQSQDQNNQ  
NQNSQSQSRDQDQSQSQSQEKLKEIEEDVDEELPFKESVALALESEDOPYLDFFKSMEE

MVDTHEIKDWESLQELLQWYLMNGKNNHGFIIIGAFVDLLIGFTPSNCDSITCYSSAASS  
FSSIEEKGE\*

>SIOFP14 Solyc03g034100

MAKLLKFRISKAISNSFHSCRSKDPCTLPQHVPVSFLQNTQFITDDHLLFEEMIQNNES  
QLISTHHEHFPIITSPSFKHHVSVTPITATGQCSSRNGEAFSTTSDDSHTRSPSHEFKWK  
KEEDKWQHFIKTNSDDDTKQQPRRKISYSFSSDNSDNDKILIEIKKKISTSKTNFFMMMS  
TTSSSSMDENEINFTSKKTKWDYHEDIDITNEDEENETETFISSSRKSHVEFPDDSSLN  
FSHEFDTIYKNTTRRCQKKIGYSKRRDHVKNTRSRSSRDMNIGRRSSISTSTTSSDGE  
LPPRLSVFKKLIPCNEVGKVKESFAIVKKSSEDPYEDFKSSMMEMILEKKIFEKNDLEQLLQ  
CFLSLNAKNCHGVIVEAFSEIWETLFSPNHN\*

>SIOFP15 Solyc01g007810

MKLSSLFKNSSQNSSSTTTTTTPWWSLPTCGKPKTLSFRLEKNQHNIYNSTFHLDDIND  
TTSCSFDDFFSEIDETSSSSTTTINGQDCIEKVIKGLRLEKERLFFEPEETSSILDFQENKN  
ISITSSNININVDEGNIISFVPMGLDSNDPFVDFRKSMEEMVEAYEIKDWENLEELLTCYL  
KVNCKSNHGYIVGAFVDLLVNLATFSDNNNNVGV DIGAGVGAGVDESTIIMTTIDEEQQC  
LSSSTTTTTTTNHSFTSPLSFCSSSCSTSSSITSTSACL SLLLEDEVIQTKKH\*

>SIOFP16 Solyc09g065350

MPRTTLGTNFNLCFTKLKRSPLRSIDDNDNDNDNERHQQQHSMHFCNSVKNFNSLY  
DLSSECNIP TSSSTDESDYNYELENNTPD LATIYASQRFFFSSPGHSNSIIDSSSSISSSI  
ASTSSSVGSDAPLEGASRFQRIHPTRI WIFDDRCKKWWRHVD\*

>SIOFP17 Solyc09g082080

MPRILQKKFYHCLPSFKCLPTILSLPFEETEEEEKTEQKKIKNFNSVFDIPSSDSATTSKSLT  
NSSTTTTEEDNNTNCTFTSFEDSDYTNIPDFSNIFASQRFFFSSPGNSNSIIDFPENPK  
VVTGGVAVQTYSPDPYSDFRSMQEMVEAHELTNVKANWGFLHELLLCYLNLPKHTH  
KYIIRAYSDLVVS LMSMDDSEKKTEGIARP\*

>SIOFP18 Solyc10g083080

MEFFSLFKSKKKPSFSPMLCRLPRCGNLRTLSIRDENNHNIFNSQRF CINVD DDIVDEVIE  
GLKFEKKRFFFEESGEKTSSILNVSSSKLSK SIGNKRLEFP PSEDESCVITHIDSIDAYGETST  
RSIFKGSSSR LTKNDYSTSNNKFESLPLNNSCVISPSAMRVTSIDPYGYIKK YMEITVEEN  
QG IKDWKESLKEICAWYLENNDNDKN IHKFIIGAFCDLWMSYS GTSTTNT PFGFSTSEPP  
SPYFMSLIEAKADQIIATSTSSVIP\*

>SIOFP19 Solyc10g083070

MKFSSLFKSNKKPSFSPMLCRLPRCGDLRTLSIRDENNHNIFNSQRFYNNVDDDEM VDEV  
IESLKLEKDRFFVEAGQKTS LILDMSSSR LSKKRTISK RLEFLPFNNDSCVITSMDSIDAYG  
ETSR SILEGSSSR LSKSTNNSTSSKRLGYLPSNDSMDSYGDQETSSILDMSSSSNDNI  
SSKGLGYLPSNESMDATSILERSKSNSSHGFVYYVPCKKTYAIMRLISRPYEDIKYFLEK  
MVDENLEIEDWEESLEELCGW LLEINEKNIHKYIVGAFCDLWMSYSCTSTINTPFGFSSS  
KPPSLYFMSLIENEADRMIAASTSSVTP\*

>SIOFP20 Solyc10g083090

MKFSSSLFKSKKKPPFSPMLCRLSRCGNLRTLSDRDENNHNIFNSQRFYNNVDDDEMDEV  
IENLKLEKDRFFVESGQKTSSLLDMSSSRLSKRRTISKRLFLPFNND SYVITLMDSIDAY  
GETSR SILEGSSSRLSKSTNNSTSSKRLSYRPSNDSMDSYGDQETSSILDMSSLSSNDS  
ISSNGLGYLPSNESMDATSILERSKSNSSHGFVYYVPCKKTYVIMRLISRDPYEDIKYFLE  
RMVDENLEIEDWKESLEELCGWILLEINEKNIHKYIVGAFCDLWMSYSCTSTTNTPFEFNS  
SKPPSLYFMSMIEDEADQMIAASTFSVIS\*

>SIOFP21 Solyc10g083100

MKFFSLFKSKKKPSFSPMLCRLPRCGNLRTLSDRDENNHNIFNSQRF CINVDDDIVDEVIE  
GLKFEKKRFYFEAGEKTSSILDVSCAITHIDSIDAYGKTSTRSILKGTKSRLSKNDNSTSND  
MVESLPLNDSCVITPSVMRVTSIDPYGYIKKHEMMVEENQGIKDWKESLKEICALYLEI  
NYIDKNIHRFIIGAFCDLWMSYSGTSTTNTPF GFSTSEPPSPYFMSLMEA\*

>SIOFP22 Solyc10g082060

MNLSSLFKSKKKSSSFSPFLCPLPHCGIPKTLSLRVENNDNIFNSQRLYNNVDDDMVDKM  
VEGLKIEKDRFFFEAGEKTSSIMKVSSSILAKSNNELEILPIDESCVITPIDSMIPCGEGAI  
SIRDQVSSSTLSNNTNNSGKQVEYLPFNDSCIILSSSMDPYGSFKKSMVKMVEANLGIK  
DWNEFLEEMLAWYLEVNEKNNHKYIIGAFCDLWISYSFTSSTTNIPNSFLFSSEP KSVIS  
PTSTSFVIS\*

>SIOFP23 Solyc06g074020

MTRKYDQCLVDNMFGPFPESCCPDEALEMAKQALATRRLSFEENESCSVLSMVGF PFK  
DCLLAVETENPKMDFLHSMEQMTKVYGAQRGDMVDWEFMEELLTWFLKINNMKNQH  
FIVA AFIDLCLGGHVQDVEPVENVEPLTDDIVNVILEELWWGL\*

>SIOFP24 Solyc03g120190

MPKQLQKSLSDYLT KKKKKATAQQTNSANKTLSSSTSWLLRGCRHPKTPSFSAVDRKE  
KNVQGENEAATLADVDRFVFENFKSFYKDDNEAEIVENPNSLSESPRHIIPLNHTGS  
RRFFIAPGSSSLIEEARTSMTVSDDTGSTSAITITTVTNTNSNELSAISTEYSKETLNAND  
FITLV TYSPSPYDDFRQSMQEMMEARLKDQGKINWEFMEELLFCYLDLNDKKS YKYILS  
AFVDQIVILRENSGRVPAISRNV RPLDGELNQRDT\*

>SIOFP25 Solyc06g082450

MNTSCCLKFNPNPCKKIVKLFKFKLRKPLFIRRLRIFRPSTRCESNTSTRRKQASQVLSVF  
RFIRRSKPREEDQVMALKSFSGHIKAPVPSPITPAYARLSGATKKEVVIFQDDVEDACRSF  
ENYLAEMIVEEGKMRDIMDVEELLYCWKNL KSPVFIDLVC RFYGELCKDLFSHTYKDDIN  
SPQKIMQ\*

>SIOFP26 Solyc01g090870

MKVKVFGRFKCKLFNPCKKIARLFKFR LRKPLFIRRLKFRRSVHKTERLRRVEREEDQV  
MELKSFSEVELHNKAPFPSPLTPAYVRLSAATR KDV PVL DNAEDACRSFENYL VETIVEE  
GKMRDLADVEELLYCWKNL KSPVFIELVSRFYGELCRDLFSNSYEDNVNTPKRLL\*

## ***Oryza sativa***

>OsOFP01 LOC\_Os01g12690

MAMDHRGGGGGGGRSSSRLRDLARMFRPGALLRSTCNNHATASTSSSSSSAAAAAG  
GVVTASACSSSRALLAADAAAVDYCGRESFLASSRRDYSDAAATALVGRTESFSTALD  
RLHRRGGGTPLPPSRFSVDASPKKEDAAAAAAAKEKEMTTAAARDVQGFHYHHRR  
HGSLGGGGGCGKSDKARRLLSNPYGFTTSDDADTDGDDVFSSDADDRGGRVVAGGG  
GGAKKGETEAFFSSSRFSDDSSEFYTKKKRNKPKKKSPSTASSKAAPPPPPPPPTT  
RHQIRRKRRARASSCVDTCGVRDGFPRVVSAAEEQVRRGFVVKRSRDPYADFRSS  
MVEMVVGRLFGAAELERLLRSYLSLNAPRHHPVILQAFSDIWVVLHGG\*

>OsOFP02 LOC\_Os01g40970

MQEDNISKKAKLRKSIQLFLSRNLKKIPPIHIPSSAIPAKITSNRLLSTCRFPRTPSLHGGG  
GGGGDHRTTDDDDGSNGRDQAATLSDVDRFLFDNFRSLYIHDGDNHQRRQPPPSPG  
KFTQPAAAETSSSRSESVAEDARGTSSGDEDDNNSSTAIMLFSVDPYTDFFRRSMQNIIE  
MHHGEEPQPLDWDFFLEELLFYQLNEQSVHXYILKAFADLTAGAHVSCPARGKPQWA  
DKSVRSRKHY\*

>OsOFP03 LOC\_Os01g43610

MHTPFVDKSPHRRDLGLGAGGWLKQRLAQILVRSTCTTNTTTTTTTTTSSSTAFVSLDKTN  
ADTHQEPPPPSPYFCTPCTYQRPKLDAPGRPRRRRRSASLVHISIDCTGGAGATSGR  
RSVHSDAPLLPYSSSLPTKDGRKQSRARRKARSSPSTSRRHCPSSSWGRARLPRGAP  
GQYSSSSSTVTDELAPFSTDEEGGEEADTRTLFSSLSFSSDSTSEFYHTNSSSSLARK  
GHKNAPARRPPARRASARITSDPADAFRPVVSVAATKKQHNDMKKKEETAIKRQLGTDD  
DTAAGAGMAVVKRSSNPYADFRSSMVEMVVERRICSVPEMEELLGSYLSLNSPQHHPAI  
LAAFEDVWEAVFGEE\*

>OsOFP04 LOC\_Os01g53160

MDGGGSGAGRKKLKHRLAAILSVFTRRAGDRKRRGEEGAAAPPPPPPLAFPSYSRLG  
GAGGKAAAGKHERRLSLSVPRPPPLVNITIDCAGRRSVDAADPSLLAPLDLDARKMER  
RLTGTGLPYETGEWEGRKCPPSTPFAAAPPLARWKERASVSSRRLSTHSSRRLMSSSS  
SDDEYDEDSRNLFSSRSFSSDSSDFYNCPKKNTRARASVSGPCRAPPSSRRGTSQS  
CRYSELFPRGSTASAATDGGFAVVKRSSDPYEDFRKSMEEMIAEGAACGGGDGDGELS  
AERLLETYLVLNSPRHYPAILAAFADVRETLFP\*

>OsOFP05 LOC\_Os01g54570

MKWGLRSSRHNQREKQQRTQEEHKEHQEDKGNKSRAAFLSFSPLAWLSKLTAKNN  
AAAAKPKPAAPADKSAVAATGGFPSCFFKGASSSTSTSVSLSSSAASQSSLADSSPADH  
QAPRRLSVGNDGDTAEAAAARQLYHRRRHYSVGGDRDLQTLRNLIPFSRAASPIVPAP  
FVPALKTTPLLPSTDEEKRPSSRRRRRRSGGGGRRSFSGRTPGARVAATVRVRSR  
RVASAAAAVSELERFAVVRRTSDPQREFRASMVEMIASKRIGRPEELETLLACYLSLNA  
DEHHDCIVKVFRQVWFELNPARVAAVAPPRS\*

>OsOFP06 LOC\_Os01g60810



MGRHKFRLSDMIPNAWFFKL RDMRAARGGAGAGGGGASHGGVVTQSSVAVSRAGRA  
CRPLPNTPRHGALSLPHRASYYYYTPRAGDLLVGSPLHPKCSDTQFPPLQLSPPRKSRR  
RHRRRSVKLAPSVSGSSVLSSPVSTGCRCGRKPELVVVEAPDTPPCRDKFVGYNDDD  
DEEEEEVEFKPTVAVAACDELDGKVITSATDIIIDLRTKRPDKVLPPIVTKPARRELDG  
CDLEEKHIDVVRASAKKPTTLLEQSKPRRSVSSARRLKTRANTPRIVAKKSKPPPPPPP  
AAARSPAPTTKPPLAESFAVVKSSRDPRRDFRESMEEMIAENGIRTAADLEDLLACYLSL  
NAAEYHDLIVDVFEHIWANLADIKM\*

>OsOFP07 LOC\_Os01g64410

MVIGRLALSSFFHNKARDTSPSPPPAPATAPPWWPSCKNPRTQSFRATAPPPPPGSR  
TIASIFLDSAESSFTTSSARHDCSDSLSTASEASAGAEAADTADDAIVRGLRSSDRLLFDP  
GASATSSILEEKSSDAAGEASFIGGVAVAFESEDPYVDFRVSMEE MVVAHGVGNWGWL  
EEMLGWYLRANGKDTHAAILAAFIDVIVAIADPALASCSSHRSSSTCTITEESSLEVAEKQ  
AKLAV\*

>OsOFP08 LOC\_Os01g64430

MSGRSSRRGSFSLRQPPVVDIGCNCRRPKLFSIFSSSSSSSFRRGGSKPKSPNASSTS  
TTTAFTATTGGAGTATSTDSSWGPASFTTNSLFEEDPAAQQEQEQLETRRRRRRQRRR  
RRRAGATSFARGGDVGGHDDEQQQLQEQAPYRRVAKESVAVAVESAEPYEDFRESMV  
QMVVEKEIYAWDDLNDLLHQFLSLNSPRHHPLILHAFADLWTRNGLFSPSPCQF\*

>OsOFP09 LOC\_Os02g45620

MMSPGVSAKKRHAGAGFTLGCCKDAKSVSVSASAAAGTPSTTATRRRSAGTNPSGST  
TTDTLTMTSASSSFLWEHSVVEFDHDGGGGCGPESFSGLLRELSELEQSVASWGRKSH  
HQHHDKKHSPAPSSPLPPQEDRKEKNGGNGDATDKPGDCRDGGGGGGDGVGVALDGS  
VAVVKQSDDPLGDFRQSMQMIVENGIVAGEDLREMLRRFLTLNAPHHHDVILRAFAEIW  
DGVFAATASLVHHHHPPPSSSRREPVAPAARPPAPRTPPRHRHPSRAWRV\*

>OsOFP10 LOC\_Os03g03480

MADQGLPSKKKKKKGSSAAAARGFMCGCGGAKSVSVVSRLSAAGNISPATTTPTMTS  
SATATSAKTTRVTVPTPAPNTVHDADGTPSVGTLLLQRELERGVRLGVREDRGIRPAT  
PPPPRHRRSASDASSGGRRRRRGRLEEEESVPVVTESDDPLGDFRRSMAQMIVENEITAT  
PELRELLHRFLSLNSSRHHHLILRAFADVCEELFAGAGEHNHHRPRRRPTKPLPYSATTN  
\*

>OsOFP11 LOC\_Os03g06350

MLGCF SRLRRPASAGAAPAPMAQSDDASTSTSAGGGGGCTAETSPCSSSSSLRCKNS  
GGVGGEDDDDGVGGGGAVVAENASALSDSGLSSAIASRRFFLSSPGRSNSIVDSSAHG  
AAVGVAAGVAVPTYSPDPHADFLRSMEEMVAALRLDARRRGDRARLHELLLCYLALN  
DRRAHKYVVSFTDLLLRITAAANLDDGEPPRHGRHLHESH\*

>OsOFP12 LOC\_Os03g10150

MAKRLFHSCRSPSVADAVVTSTTTLLATDHPPFFPGSCP RRVP RRRRPQQPPPGACAAG  
YAADDLTARGTPAYRWLKSSQWHVIEAAGITDDDHTPRLKIDARSRLRRSRRLHRRRA

DPVSGSSGDSGWFTSDEDSYANSCGVGVGGGEAETLVSTTTTESSSGASGNCGGSGE  
VDGVVVAGSFAVVKRSDDPRADFRRSMAEMVVGRAIYDADGLERLLRCFLALNHQRRH  
RDIVAAFQDVWEAVFSNPTSSQRRIVTSDSAICKAAATVSNRR\*

>OsOFP13 LOC\_Os03g21870

MPASSSSSRWSWLHKLKLRRRRKKKSKRASPASTARPSDASAVPPAAPRQPPAAAAPA  
GGLSPCCCYCPNRESYYLNSADRARQEDRQDMLLPCDDEVEEEEALDVGVDVHRRRA  
DGLDAPPATPELKLRPVITSRRHAAAGKNEASDSSSTSAAATPSTRARGFHV RPTAASR  
RLRRVGSSGGGHDSNNAGTPVSAPAPASSSSSVSAGRPSRRPRRRRMWLRESEAVVL  
ESTEPELELVDSMIEMLCNNGVRRLEDLQDLLACYLSLNAAEHHR TIVALFRRVVLVWIHL  
GSQRLLPGQ\*

>OsOFP14 LOC\_Os04g33870

MPPLNPPHLHFGKLRKRARAVAAGGGRQPAAAMAKKGLVGILYKLRDVHHRAPPTPTSP  
SSSSSPHCHGRHQLCYPPAPSSWPWPSCRHPRTSSFRWPTAPQQGQADDDAAAAAG  
SVYRTVNTVYDTSSLEHFNPRRSSLDEASSCIADRSFFAVESEVEVEEEEKEKEKELQLRE  
TAVVRGVRSERLFFEPAGAEFLPKQEMARGKNDDEATAMDV VARKNDDVDEATPMTTP  
QTGKNEAEAAEAAALKGGAVVLTVESEDYPYGD FRSSMADMVAAHGLRDWEGLEELLA  
WYLKLNAGVHGVIVGAFIDMLVSLASSPIPSQSPSSSCITFEDYSSATMEEEES\*

>OsOFP15 LOC\_Os04g37510

MVQARLQSMIDAAAGRSSAASRPRLPRHGT TETAAERQVQRGGPCRCACNYCGGHY  
DDGGGGASCGQRRPCVVLVAVDRRTSDPREEFRRSIAEVITAKRMAEPAELRALLNCYV  
SVNAREHRAAILEAFHEVC SGLFSRKR\*

>OsOFP16 LOC\_Os04g48830

MSPSAAAKMRLGGGGGGGGFMLGCGCRDAKAVAVAVSATSPCSAATETSTATTATWRR  
ARTHPSASASASTGTLTVPSASSSFLWDDADA EADGEEVDFKRESSATTPSFSGLLRQL  
NELEQSVMTWGWKSPRRGNHFSPPPPPPPPPLPLRPVVLHRAVDAGGKRSNKEDDA  
KFSSPPSSHCPPTQLHRKVKSVDQRNREDDEAHFAPPAPPPLPLPPQQLRN VKGVDK  
GGSKEDSKHCPPPPQAPKHKTKSCDNNDGFTAGKLDGSLAVVKQSEDPRGDFRRSM  
LNMIVENRIVTGDELRELLHRFLELNAPHHHDAILRAFAEIWDEVFAGPDEPRHGPPRPP  
PRQRTPPRRRHPLPAWRL\*

>OsOFP17 LOC\_Os04g58820

MVRKLVASLFLGGGGGGGGGNDACSLSSSSSTASSWQWPSCTQARTLSFARHDAPAS  
ADDDDSKRRRQEEEEEDDYCVYKTSVMNPAFFLDDHSTCRSYSSAASAVNDVVD DDD  
EVIIRGLRSSNRRLFFEPESTSSIVVKGRAVDADAAAFDGATAMSIDSADPYGDFRRSME  
EMVM SHMSGGGHDWGWLEEMLGWYLRANGKKTHGFIVGAFVDLVVALASSPSSATAS  
SSAFQLPLQKGSQIN\*

>OsOFP18 LOC\_Os05g12808

MDDGAKSGGGGGGR TKRLKDRLARLLLLRSPCSSSSSTSTTFTAATNVSTTTTTTTASS  
TATTA AFLPRVEPFSAALDLLRHPPHPPPPEEEKKDINRRNSSRRRGHFKPKLSSNPYGF

TTSDDDGEGADGDDDDDDNDGTEAFFSSRSLVSSDSSGFYACSSKQQLLPHKSKANR  
HRHHRHRHQKPTTTRRRRRRRASGCVDDACSVRDAAAFRPLVSTTAEEEVRKGLAVV  
KRSSDPYGDFRESMAEMIVERQVFAAAELERLLRSYLSLNPPRLHPVILQAFSDIWVVL  
RGG\*

>OsOFP19 LOC\_Os05g12808

MSSHERFRLSHLMPNSWFYKLRDMKRPRPTSSRMITAADHAARSSRRSSSSSSSIHHY  
YLHGHGTTTPKPLPLSPRRSYYPYLERAKQMPLMEKESQLISHSPLHQRIPTAIPGDH  
HDGEFQDLQLRPIRTRPPSAAAAASAEPRTASGSGTCPSPRMRSRRLHVLGGCECRA  
GSGRRRS GG GGFVVKASAEPARDFRESMVEMVVGNGMRSPEDLLELLECYLSLNAR  
EHHGVIMEAFRGVWVEIVADADCCVGL\*

>OsOFP20 LOC\_Os05g36970

MAPLMSGSGGGGSARRRPLRQPPVDDDDVGCSCPKQRLLRSLSSLVSRARGALGG  
RAVSRPKSSAPPSSSASTTTTAAAAFTSTSTTGASATTVDSSKESWGPATYAATNTHTL  
YEVEDEVRRQRKDMRRRRRRRAAAWDEEEEEEGAAVAVAVEVESAAPYEDFRESMV  
AMVVEKEMYAWEELNALLHQFLTN SPRHHALILHAFADLWAPRSGLCPPSPCQAL\*

>OsOFP21 LOC\_Os05g36990

MHVLFCSDSRRTLQNTCTTSTEENPTSKAHIHTNKHPPSAASAAALASTATPMVRK  
LPLSSVLYTINSARDIPPSSPPPPAATPPAWMWPSCKHPRAHSFRSPSAASAAAAKTIA  
SIFLDGESSFANSSARMHHDCA SD SLSTESDVSATAEDMADAIVRGLRSDRLLFEPR  
PSSSILDKKPVRRAAGGGDDDDGAA SFGGGVAVAFDSED PYEDFRASMAEMLAAG  
VGDWGWLEAMLGWYLRANGKETHAAIVAFVDLVVSTAARGSSSRHSSFTLAGTDLE  
SSSAGGGAAGHISFRLR\*

>OsOFP22 LOC\_Os05g39950

MLSSEPGVLTGRYGPFFSETRKEQKEQRNLAPHALSRRYLSRAGHGVVALWPGPPFDL  
SLLLHSSSSYSAEERRRRRRRAGERRAREDMGRRKFRLSDMMPNAWFYKLRDMRAR  
GGRGATAMQPPSSSSLMRGSRAAQQQAGTWRLGTSSSSSLLPHRASYYYTTRDREV  
PPLPPPPPPRGVDDQFSLTSLPPLPTRNSRRRHVRGFRGSTEMDGGELVLAPSDDHD  
GCSHQEPVADASGSSRCRRDMFIGRDGGRGVEFRRRATTVDGPEEDAAVDVKVITSD  
ADIIDL GADDDDDTPERVL RPVVTRPARRELDWCEPAEVKHVDLAELMTPRASSASASS  
EKSISTGKPRRSSVSSRRRLKTRTNSPRLAACRKGKPTARATTTTPTQPPLAHSFAVVK  
SSDPRDFLESMEEMIAENGIRDAGDLEDLLACYLSLNSGEYHDLIVEVFEQVWTGLAA  
ACGVMP\*

>OsOFP23 LOC\_Os05g44090

MGWGIRRQPQQQAAAAAERGGGGK GKAAAFSFSPLSWIAKL TARSSHGKCGGAKHAP  
AASMAGPSCRLPKRAAAAAASSSSVVA AVDDVAAGRSSPPRRSPVDVAPRRLSVGNDS  
AEAVARRLCQQRRRRRHCSLGGDRDLPLGLHLPFSLAGSPASQPPENAAAAAGGA  
TPSDTDAGAKLRTRRRHRRRAHRRRRSSLGGSGRRSFSVSGRMPAVRIRPPRAASAPE  
LERLAVVRTRDPQRAFRRESMVEMIASSGGSIAARPEELERLLACYLALNADEHHCIVK  
VFRQVWFYINLHLHLSRRRRRARHC\*

>OsOFP24 LOC\_Os07g48150

MSDSCKMPLPLFHRNISLLPLAANFSVIKSGVQPRCTHCSSAHPHSPRPHCLTAAAAAT  
MPLLSSWLFHKLRRRRSAARGEPDVVEAASKKQQPPMAAAAAAAPCSPSPNRASYF  
ASRERCLPPARAATDNHKLDRTRFPRSPQPNDDIVFDVVAVSASPARGQFDGMKAMPE  
LKLRPILTKRATAKNDGDEGDALDSGTSAAAASPTSRVRRFVHHAKPSSGRRKGRVAALP  
ADATSRRRRRRRRRCRWLYESLVVKESADPEEDFLESMAEMIAANDVRSPRDLEELLA  
CYLALNAAEHHRRAIVGAFRRRAWLHAAAATAAPPSPSPIK\*

>OsOFP25 LOC\_Os08g01190

MVNRKKKKTKLGITSLLFSSSSSSGRDTSTTTSGLPYSYSSCSNMSSSSSAAAAAWQW  
PCKQPRTLSFRQQQQTMMKTMNSAYLSAGFSFASRDSHSSTCSCCRSRTASDASAS  
ADAVTRALRSDRLFFDPDASPAAADLKLNAKANKTKKKVEAFGGATAMTIESSNPYR  
DFRESMEAMVTSGGGGGGADDWRWLEEMLGWYLRANVKSTHGLIVGAFLDLLVSAAA  
SPAASSSSSSPAAKGKYSSCCSACSSSSIKLEEEHQLRHY\*

>OsOFP26 LOC\_Os10g29610

MAGCLPTAGLRRLTLPSPPAAAVGHEEGSSTSAASTTVGTGVAPVVVGVDLVP AFL  
DDLDPPLYLDDVEAEADAGGLSTAIASRRLFFESPGRSNSIVDSAEPAAAAAAVPRGN  
GGASTSSSSSSGRPAAAPSRAAAAATGKGVRVCGDEQARVPVPVSTAAPREEFLKSMTE  
MVDAMGLDVARRGGDRARLHELLLSYIALNDRDALPDILGAFTDLLALNAHGPAATPAD  
GVVRERGGGGDARRKA\*

>OsOFP27 LOC\_Os10g38880

MKVMTLRRGGAGAGIRIKKKARGFMCGGCGGSKAVSVSDGSDKQSPMATPPPNTSST  
TTTTTTGSAGNKTAAAGSSSFSPSYDYDYVDTADTSVGSTPSVAALLRQLGELERSV  
RSLQGAVAEGRGAKNDGRGGGRRHRRTVSDGGGGGSGRVEESVAVVKESADPLDFD  
RRSMLQMIVEKEIVGGAELRELLHRFLPLNSPHHHHVILRAFAEIWEEVFAGYERTPDFLV  
SSRHRRTKKKLPA SYTAADDDDDDSWNAA\*

>OsOFP28 LOC\_Os11g05770

MAKKKGFTSIFSRLLVVTGGGDDERGGGAAATTSPSPPPWPWPSCGNRPRTVSSRRD  
GGCSTSAAAAASAAAARRIAGEMYKTVNSVYFDYSAADGYSCFDDDDGRVVD DDDDG  
DSFSTTTASEEWSEAVIRSLGRTSTDRFFFDPGPPTNSILAAAAPETKPVAAA V FHDE  
EKEKLPEPPASLVEESVAVAVESED PYSDFRSSMEEMVA AHGLRRWDALEELLVWYLRV  
NGKHNHALIVAAFVDLLVGLAAAATTTGTTPTTTTTTSSGRSTASTSTACDITTTTTITSS  
ATATMEPCPCGGGSSDDLEEEEEEARVMISLGASSCSLAPSTFANS\*

>OsOFP29 LOC\_Os11g05780

MSTSMARRGGGGGGGGGRHQFPVGRRRRRHVPVVDSGCGCRPRRPRLLSLASFIWPS  
SMSSACKQAAAAAVAVPARVGGGGGSKSKSSPYFRSSSSAASFSSSSAATTYSTASYYS  
SSRGGGGGAKKKKQEEEPY LAPPKGKAAAKSPSRKKKTA EEDDGGGGVGVAVEKE  
SSDPRADFRESMVQMVVEMGLCHWDDLRSMLRRLALNAPAHHAAILTAF AEVCAQLA  
APSPPPPPYGGHRRS\*

>OsOFP30 LOC\_Os12g06150

MGKKGGTLTSLFSRLAVAAADSPSCAKNPPHTASFRGFYYVDEPCTTAGGGGGGRSPAA  
GRLRKGGDEMYKTVNSVFFDDSDAAHAVADGCAFSGEDDDDDDRFSTTTAADEEWS  
EAVIRSLGRRTSTDRFFFDAGPGRPAATNSILATVRPRRPPPPPPPPPPAEEEEKEKAAAE  
AAQLPGKSSSTSSSQLVEESVAVAVESEDPYGDFRASMEEMVAAHGLRDWDAL EELLS  
WYLRVNGKHNHPLIVAAFVDLLLALAAVPSSSSSDTTTTTTAAATTTTSDTSCSTASTSTT  
SNGATSVTAAATAAEQCGGGGGGGDEEAGCSSSSSCCAASDHDHEEVSAIS\*

>OsOFP31 LOC\_Os12g06160

MSTAASRARRGGGGGGGRHFPVGGGRWRHVPVVDTGCGCRPRRPRQLLSLPSFLR  
PSALKPPVPRSTSSHSSSFFPSSASTASFSSSSAATYTTYSSSSATNQYPYYGKAAAAA  
AAPVTVTTNNHGKSSSSSSSSSAAAAARRRPSRKKRYEKMAAAEEEEEDVGVAVEKESS  
DPRADFRESMVQMVMVEMGLCGWDDLRCMLRRLALNAPRHHAAILTAF AEVCAQLAAP  
PAPAPPPPPQPTAAYHYHYHYHY\*

## ***Capsicum annuum***

>CaOFP1 PHT93985.1

MSSKIKKWNFGKLCISNGAGCSGCNKPNLADIVEPKPKIPIQTNPSSNNICHTSTNSCEIN  
GHVYSMADDDKNDDFDQDDQTSTTFSDISSLSPPSSYQNNLSQSEANSGSRVCTCP  
EIDNTFVVVTNSDDPFQDNHISKPFISITNIDSLSALNFDQNYGTNFSQSETNSEVKISTCQ  
KIDVGLIVAKNLDDPFHDHHTSVTLNKTPLSPSKSKQNDINLSRIEVNSESKVNTCSK  
IGSSLALVKNLDNPFHDNHTCPHSHFNTKLLSPPSSNQNACTNLSQSETNSESIDTCPK  
TSNTLAVVINSDDPFQDFKKSMLQMISEKEIYSSSEDLLELLNYFLKLNSPSHHYIIQAFMEI  
LNND\*

>CaOFP2 PHT95520.1

MSTTHRRRRIILSNVTVKLGCSXXXXXXAAFAEGFGRIGGESVAVEKDSDDPYLDFRQS  
MLQMLEKEIYNKDDLKELLNCFQLNSPYYHGIIIRAFTEIWNGVFSLRPGVAGASSPFLH  
GGEGHVTYM\*

>CaOFP3 PHT95521.1

MKLSSLFKNSSQTSSPWPWPLPTCTKPKTLSFRLNKDDDDNNNNIFNSTFHLNDNDNT  
TSYSLDEFFSEVDETSFSTTTTNGQDCIEKVIKGLRLEKERLFFDFQESNNIINTSTSDN  
IDISFVPIFDKESAIVMGLDSKDPFVDFRESMEEMVEAHGVQDWESLEELLTCYLKVNCK  
SNHGIVGAFVDLLVNLGTNSNDDGVGGLSCADSSVLMSHPFQFLQKYTSFGESNTHP  
STLGASDSTMMKSVNEEQCVSSSSTTSHNSFTSPLSFCSSSTSSSSVCLSLLEEEDEV  
IQRKKQC\*

>CaOFP4 PHT90291.1

MKWGKKKTSSSLITNVFPVSWLSKFKQKKGDNSEYQEAAMKHKGKVNLTSTSRSDV  
SLKEGRFYDDDPYWRLSFTENNFEAHHQNQIQNPLWCGSYDECDQDSTWNSKSILG  
EEKQKFNDMVSRIKREKPKMLISQSEAEFSNRRRNSIRDEKLRKLSRRALEERIAENAR  
EPDPEEETAAEVIEKDIFEIEPENЕКVVRGKVKSTAYNTRKMRSLSKKDSSLNSIEESCM  
MLKSMNLEEEAGALSEEEFESECLEMKEMRIKETSEKSGYQQRKSVYINQKRRRKHGV  
KVRAYSPRTTAKMECRIKALEDVKKAKMKMRQKTEKMGGDRTVFD SYAVMKSSFDPF  
SDFRDSMIEMITQRGIKNSEELEELLACYLTLCDEYHDLIKVFRQVWFELKPVNIGAE  
LQKCRCSDD\*

>CaOFP5 PHT91194.1

MGKSLKLRFKVIASFNSCRSKEPSSVPQNPNFYPSHTTNNSKLSTNPNTPYEPEFKW  
QKEEFHVISSSFVSEEEEEEEQCEEEIHLAIKPPTPPRFSTHHVEKTEKKKRRVKKT  
KTRSRARMSTSSAEYCRTESEEEETETLVSSRSFDFSSDDDSSTDFNPQLETICETATI  
RRRYKRNGNTKRRVKHSRPSFSSSKGRRSSVSTSSDSELPARLSVFKKLIPCSVDGKVK  
ESFAIVKKSQDPYEDFKRSMMEILEKEMFEKNELEQLLQCFLSLNGKHYHGVIVDAFS  
EIWGTFLGNSNNNDGNDRGRRKSSHSHPPAAVCRMSL\*

>CaOFP6 PHT85943.1

MPKILQKKFYHCFPNFKCLPTLLSLPLDETHEEEKITDEENTFKNFNSVFNIIPSDSTTASK

SLTNSSTTTTEAEEEEETDNHNYIFSSFDSDSDHSDSNNIPDFSNIFASQRFFFSSP  
GNSNSIVDFPATTTSLSPEENTKVVNGGVAVQRYSPDPYSDFRRSMQEMVEAHELKDVK  
DNWEFLHELVLCLYNLNPKHHTHKYIIGAFSDLVSLVSLEEGKMTGARS\*

>CaOFP7 PHT88768.1

MPKQLQKTLSDYLSKKKNKSTAPQQPAVSTVKTLSSTPNWWFRGCRHPKTPSFSAIDH  
KEKNVQAKNDAATLADVDRFVFENFKSFYSKDDNSETEGNKISNSNIVKKGKKEEIIAQN  
NEENAGGSKSLSESPSVPRSRFFMAPGSLSSLIEVAARASMTISDDTGSTSAITTTNTT  
NETVLNPDDFITLVITYSPSPYDDFRQSMQEMMEARLNDQGKINWEFMEELLFCYLNLD  
KKSYYILSAFVDQVIVLRENSGRVPAISRSVRTLDGELSKRNM\*

>CaOFP8 PHT84793.1

MLSRIAKILLVSSHPEVYEPCCDSFALVDALVADRINLLQHQPSCIMEIDINPHALRVTS  
VDAHGVYAELVNIDISSGLEKRLTGLVDVMVNPYPVPTPEDEVGCEGITSAWAGGEDG  
RSICWRFSSILFRLNISASSLLLLKGIVFLDMTRRFKLKLSMPSFRFCRSNKASFLPKSPLP  
ISLYKFSNGSILDNSPVPVPPSTPHHYSAYIFRKDHNLAHKTYNSPSSEYSDHDNNNMRR  
RRSRNSKLNMSFSSADSGWLNFTSECDDEKPNDETESFIFSPSFESSFDVDYPMPLT  
GTMNRTKKNNNAKVRRLKRYLSNSFKDSVTKASVVERLMPSCMADGKVNESFAIVKKS  
ADPYDDFKRSMEMILEKEMFEAKDLEQLLLCFLSLNSRHYHAVIVEAFTEIWEELFDKS  
FEVSGSKDPKISMNNHT\*

>CaOFP9 PHT82131.1

MSTNKKRIFITRSVTIKLGCSSSCIRPKFSSIFHPKPRQHKKTTDEKTNNYANA  
EKTVEGF  
GRIIGESVAVEKDSDDPYVDFRQSMQMLEKEIYSKDELRELLNCFLQLNSPYHGIIVR  
AFTEIWHCVFSVNLGVSGADSPFL\*

>CaOFP10 PHT82132.1

MKFPSFFKIQETCPFIPCENLKTPLSRVENNHNFNSQRFYNNVDDDEIVENVIEELKEVK  
ERFFIEGGGKTSSILEVSSSKNNDGSNTSEFQPCSDSSSVMMIDSMDYFDNSKKLKG  
KWVEANQGIQTSSILEVGSSSKSDDISSKRFEFVPLNDSSFVMMDSMNPLGNSNKS  
MK  
EMVKSSSKNNNSSSIGLKFMFNDSSVIVLMNSVNPYEDFKKSMEEMLEENQQIKDCEK  
CLEELLIWYLKSNGENNYRYIIDALSDLVNDYNSSTNATSCSHSFTNSPFFDSTPSVSASS  
PFLSLLEAEDEIVDEITTRFSV\*

>CaOFP11 PHT82493.1

MAKKLKICSIFKRKEQPLLAITWQWPSCTHSKTLSFRGDDNIFKTINSIFFDPFDGIETPQ  
SSSSNSISIDEEIKGARSERLFFKPDATSSIVQQHEEEIQENDDLPFKESIILAMESNDPYL  
DFKISMKEMVESQGIGDWDNLQELLAWYKLNGEINHGFILGAFLDLLMELVFPITTPSIIS  
DNSTTSYSSAASSSFSCPSSPLSSLGQKEIEEQEKGVKVP\*

>CaOFP12 PHT79195.1

MEEKVEANQEIKISSILEEASSSKGNNSGNGLEFQPFNDSCVIADMDSVKPYRDFKKS  
MEEMLEANQETKDCEKFLEELLIWYLKSNKIIILGILLMHFFIC\*

>CaOFP13 PHT79899.1

MCACCTNTSLTFIYTPYLHHLFHDTHHTKRNLLQMVNHKTKKMLQRQRNRVSFSANMP  
DDVRGAIAADSICVVKYSMDPLTDIRESIKEMVKIVGIKDWKEMEELVYCYIVLNSKEVHSFI  
QEAFLSLCT\*

>CaOFP14 PHT80370.1

MGNHRFKFSDMMPNTWIFYKLKDMSTKNHKTPFSSTSSKSQFSQPRSSFSYTRKSIRV  
DKIYNASHAAYTFLDPPRKSSSSSKKSKRKTIYKPSPKHIPSSITSSNNNYASVSNKLGSA  
SSVSSTEDNKFPELDFLNSPSSDWPNTCSCHFTSSSTDIIDVNDIARSNIFNNIDTAYAEI  
SELDQLPPILTKQSSSIKNIKQDDNAKPRREKEPTNKVGSPVSRKHYSNSSGVRRLRTNS  
TKIASKRNSVSSKRRSKAKKEKCSTSTGTSFAIVKASIDPEKDFRESMIEMVVENNIRASK  
DLENLLACYLSLNSNEYHDLIIKAFEQVWFDLSDLHL\*

>CaOFP15 PHT76741.1

MQNSKAAAANKQKLKGCSALCCSCRLSVSSSSSEEVSSSSSGRYPTISSLTHAMVQERL  
DKMIREREEAKNEERRRRRAERDEKTKFIVMIAMEKSSYDPREDFRESIGQMIMANRIC  
DPKDLRRLNYYVSMNAEEYRGVILEVFHQVCTSFFLSCKQSSSHQV\*

>CaOFP16 PHT74641.1

MKVSKGSKTHRSNKNESNLVKSCSSNSGWFSSEGENGETEDAIFSLSSGYFSESFRKK  
YNQKSWETSRCSSSELSANSVSTALSENANGRAESNLNESKWVKSINGLDFAASRTEQ  
NRGKVSRSARKTAGTYRKKYNQASSVMSRSSSELSMNSISTTLIEEMTNKRVGSNLNEL  
KQLKSINDYYFPTSKEQNRTTTSKTARRTAEKQTRSGGRTHRKIIPVENFDYYNECTSD  
TRRRTTKSHRIKKLRSINSDMGKFTIVVDGRIEESIAVEKNTSDPYSDFRSTMLEMIVEK  
QIFGIKDLQRLHCFSLNSPSFHNIIFEVFSEICETFFN\*

>CaOFP17 PHT72525.1

MPRNTLGTNLNLCFTKLKRPLPPQSANHNSNEHHSSLHFCNSITNFNSLYNLSLDCNSNI  
PTSSSSTNYSTTISEESDYIYELATTPDLATVYASQRFFFSSPGHSNSIIDSSSSSMSSSLT  
STLSSVEPRESDALVVDGSAIPTYSPPYLDFRISMQEMVEARGLTDIRGNWDLHELL  
MCYLTLPKSTHKYIVDAFADLIVCLMTSKSSQHLDPGAGSTSKCSQKCILDYKNPS\*

>CaOFP18 PHT70189.1

MGNKYFRLSDMMPNAWIYKLKDMSKVSSKSKGHSHTTSSSSTSSQHSSLNLQPDKKR  
QPPHKLCCQRKSYIYISRNLPSETFPHNPVSSNSPKASDNFHFTEPPRRSSTKKRSVN  
RRRNSSSPKLVTSVVSASCSGRASIKSVWTKADSNTPEEYPNSPHSSSSSSSMSSSLSL  
SDKIQAPKKLDPVTSISPSCIKDNDLDQKFHSISKIDLPPIITKSEKFDQNQIIKQEQSIAR  
RASSGVKLRTNSPRITNCRKIQASRSVSSRRTSVTESFAVVKSSRNPKKDFRESMVEM  
IVENNIRASKDLEELLACYLSLNSDEYHDLIIKVFQIWFIDITKY\*

>CaOFP19 PHT71118.1

MVEANQGIENSSILEVGSSSKSDDSSSKGFEFVPLIDSSVLTMLNLDPLGDSKKSMMKGM  
VESNHKTKTSSILEVASTLRSDNNISNGLKYLFSNDSFVLALMNSVNPYEDFKKSVEEML  
EVNQQTCDCEKCLEELLIWYLSNGKNNHSHSFTIPPFFGSTPGVSASPPFLSLLEAEDE



IVDEKILCVIS\*

>CaOFP20 PHT71146.1

MKLPSFFKIQETCPFIACGNLKTLSFRVENNHNI FNSQRFYNNVDDEIVENVIEDLKKEKE  
RFFYEGGERTSSILEVSSSKNNGDSNTFEFQPFSESSCVTTRMNLKDPFGNSKKSKGK  
MVEVNQGIEISSIREVGSTSKSDDSSSKGFEFVPLNDSSILMMDSVNPLENSKKSMKEV  
VESSSKSDYNSSNGLEYLPFNDSSIIALMNSVNPYEDFKKSMKEMLEANQQTTECEKCL  
EELLIWYLKSNNGKANHRYIIDAFFDLVNDYTSSINTTSCSHSFTNSPFFGSTPSVSATSPF  
LSLLEADDEIVNEITMTRRFSL\*

>CaOFP21 PHT71148.1

MNSVNPYEDFKKSMEEMKANQQTKEYEKCLEELLIWYLKSNNGNRYIIDAFFDLLNGYT  
SSTNTTSCSHSFTYSPFFGSTQSVSASPLFLSLLEAEDEIVNEIATTRRFSL\*

>CaOFP22 PHT71152.1

MDSVNPSPGNSKKSKKEVVESSSKSDNSSSNGLEILFNGSSIIALMDSDNPYEDFKKSIE  
EMLEANQQPKDCEKCLEELLIWYLKSNNGKANHRHIIDAFFDLLNGYSSSTNTTSCSHSFT  
ISPFFGSTPSVSASPPFLSLLELRMRVLMRLQQHEDSRFNLIGGI\*

>CaOFP23 PHT69076.1

MSSKNKKKWNCMITSNGKSNCGCTKPKLSEIIDPKPKQKQKQKPEHISTNLPKIVGSA  
IVKDSNDPYEDFRRSMIQMIMEKEIYKYDDLNELLNCFLELNSPFHHDVIVKAFMEIWDN  
GKNFNKEGGGGGSVD\*

>CaOFP24 PHT65371.1

MGKKMNLGSWQWPSCAHTKTLSFRANANNSNNIFKTINSIFLDPCSTDHHQHGVVETE  
TTPESWFTNSSSESASFSTESDETGEPLMELIIGVRSERLFFEPNCTSSLILDEQKVNQD  
QNQNQEPKKLEQEEEDVDVDDDDQELPFKESVALAMESEDPYLDFKKSMKEMVETNEIK  
DWESLQELLRWYLMNGKINHGFIIIGAFVDLLIEVSPPTCDSITCYSSAASSFSAPSSPLS  
LVGNKEIEEQEKGSSSS\*

>CaOFP25 PHT62009.1

MFGLFPESACCSTCPPEEALEMAKQALASRRLSFEENDSCSVLSMAGFPFKDCVVLAVD  
TENPKMDFMHSMEQMTKAYGGWEGEMDWGFMEELLTWFLKINDIKNQHFIVAAFVDLC  
LVPS\*

>CaOFP26 PHT60812.1

MTNSKIKKFNFDKEFSNFDYKGLFSSDEESEDEEFDNNTLFSSRSFSNSDSSEYSSLGX  
AALAVVKKSKDPYGDFRESMLEMIMENQIFGGKELENLLECFLKLNSKYHHGVIIDVFTEI  
CEALFSSLS\*
