# Supplementary material for: Genome-Wide Identification and Characterization of the OFP Gene Family in the Wild Strawberry Fragaria vesca
Source: MDPI journal article supplement (doi:10.3390/agronomy14030569), 2024-03-12
Supplement: s1 [file s1]

## The CDS of *FVOFP* gene family in *Fragaria vesca*

### >FvOFP1 FvH4\_1g04770.t1

ATGCATTTATACACACCCCAACCTTCTCTTCTCCAAAACCTCCTCTGTCTCATTCTCTCTCTAAAGCTCC  
TCTGTTTCTCCAACCTCTGTACTTTTCTCTCTAAAAATGGAAAACCGCTTCAAGCTGAAGCTCTCGCGCATGTTCCACAA  
GGCCTCACTCGGCACCTGCCGCTCACGTAGCCTCTCCGACGTGATCGAAAAAGCTGTGTTTTTGCCTCAGAATTGTAAC  
ACTAGTACCGACTCTCCTCCAAAACAGCTCCTCCTCCTAAGCCTTTTCCGGCAATTTGCCGGCCTAAATGCTCCG  
ACGACCCGAAGCAACAACCCATCAACCACCGCTGCGTCATTTCCAGATCCAACACTGACCTCATGCTCCCCAGACGCAA  
GATTTTCTGAACGTCGCTCCCCGTTTGTGAAGTCTGAAATCCTCCAAATCCTCTGTCTCGAACTCAAATCCGTCTTAC  
GAAGTCCATGAAAGTCACAGCTTTCGACAGAGGAAGAAGAGAGGGAGCAAGAAAAAGAAGAAGAGGAGTCAGAAGAGTG  
ATATTTCTTCTTTGGATAGTAATCACTACTACCACAATGGGTGGTGGTCCAGCAGTGAAGATGAAGAGAAAGAAGACGA  
GACTGATACTCTGTTTTCTCCAACTCAGCTTCCGATTGCTCAGGCTCTCGCAGGCGACTGCGTTTCGAGTTCTCGG  
GGAAAAGCTCAGAGCTTTGGCCGGAGAAGAGGAAGCTCTGTCTGCTCTGAGGTGGGTCTGATGCCATTGCAAGGAAAAG  
TGAAGGACAGCTTCGCTGTGGTGAAGAAATCTAGTGATCCTTACAACGATTTTCAGAACATCAATGGTGGAATGATCGT  
GGAGAAGCAGATATTTTCAGGCAAAGATCTTGAGCATCTTTTGCAGTGTTTTCTGAAGCTGAAGCTCGCCTCATCATCAC  
AGAGTTATTATTGAGGTGTTCACTGAGATTTGGGAGGCTCTATTCTCCAACTTGGGGACTTGA

### >FvOFP2 FvH4\_1g09620.t1

ATGGTGGAGGCGCGTGAGCACCAGACGGAGGACGAGAGCGTGAAGGTCAAATCTAACTGGGAGTTCCTGCATGAGCTGC  
TCCTGTGTTATCTCGCGCTCAACCCTAAGAGCACTCACAAGTTCATCATCGGCGCATTTTCCGATCTCCTCGTCAGTCT  
CCTCCCTCACCCAAAGATCCCGAGTTACCCGCCGGCGTCTGCGAGATTTCCCGGTGCAGTTAA

### >FvOFP3 FvH4\_1g13640.t1

ATGGCGAAACGTTTCAGGCTCCGGATATCCAGAGTCATACCTTCCTTCCAATCCTGCCGTTCAAAAGACCCCTCCTCTC  
TCCCTTCCAATCCCGTCCCTTCATTTCTCCGACCATCCCCCTCACTCAACCACCACCTCTCCACCCACCTTCCAAACC  
CCACTACTCATCCTCCATCAAACGCCACGTCTCCTCCGCATTGCGCTGCGGCTTCGGAACCAAACCAACCCTATCCGAC  
GACGATAACGGATCACTGCCGCCGGAGGTATTTGAGTGGGAAAGAGAGGACAAGTGGCACGTGGTTGCCATGGTGGACG  
AAGACAAAACCCACGTCGCAAAATCTACACTTCCTCGGCCTCCGCTGACTCCGAACGCGACGACGCCGTTTCACTTTC  
GTTTTCTCCTCCTCCACCACCGCTCCGTCTCGGCGGAGAAGAAGAAAAACAAAGACTGAGGAAAAAGAAAAACAACG  
ACGAGCCGTATGATCCGCTTCAGCACCTCCTCTGCCGAGAGCGGACTCTTCAGCGACGAAGATGAAGAAAACGAAACCC  
TATTCTCCTTCTCCACAGACTCCTCCGCCGATATATTACGCGCCACCTGGCAACCATCCGCGAGACGCCCCCTAGGAG  
GAGGAAGAAGATCAAGAGTAAAGCTAAACGCAGCGTTTCAAGGACGAGTGGTGAGTTTGAGTCCCTAGGCTGTGGTG  
TTTCAGAGGCTGATACCGTGCAGCGTCGACGGGAAGGTCAGGGAGAGTTTCGCGGTGGTGAAGAAGTCGGAGGATCCTT  
ACGAGGACTTCAAGAGGTCGATGATGGAATGATATTGGAGAAGCAGATGTTTCATGAGAAAGAACTAGAGCAGTTGCT  
TCACTGCTTCTTGCTTTGAATGCGAGGGAGACCATAGGGTTATTGTGCAAGGCTTCTCTGAGATTTGGGAGGGTTTG  
TTCTGTGGTAGTGCAAGGTCGTCAGGAGCTAGAGTTTCTAGAGCTCTTTAG

>FvOFP4 FvH4\_2g23310.t1

ATGCCAAGCACCCCTCGGAAGGAACTTAAATCTCTGCTTCACAAAGATCAAGCGGCCACTCTTGACTCTCCAATCTCCTC  
CCGTCGACGATCACCGATCTCCACCAACAACCTACCTCCACCGTCTCCACGGCCATGTCATCCTCGACTGTTATAAAAAA  
CTTCAACTCCCTCTACGACGGAGACCACGCCCTTCTTCGACTCCGCCACCACCTCCTCCTCCATTAAGTCTTCGGATCTC  
TCCACCACAGAAACCGAAAACGACACAGACACCACCGCCGCCGCCGACTTCGCCACCGTCTTCGCCTCCCAGCGCTTCT  
TCTTCTCCTCGCCCGGCCGCTCCAACCTCCATTGTGCGACCACTCCTCCTCCTCCTCGTCTTCTCCGACCTCCACGCGCC  
CTTCAAGCACAACAGCGTGGCGGTGCCAACGTACTCGCCCGACCCCTACCTCGACTTTCGGCGCTCCATGCAGGAGATG  
GTGGAGGCGCGTGAGCACCAGACGGAGGACGAGAGCGTGAAGGTCAAATCTAACTGGGAGTTCCTGCATGAGCTGCTCC  
TGTGTTATCTCGCGCTCAACCCTAAGAGCACTCACAAGTTCATCATCGGCGCATTTTCCGATCTCCTCGTCAGTCTCCT  
CCCCTACCCAAAGATCCCGAGTTCACCGCCGGCGTCTGCGAGATTTCCCGGTGCTAG

>FvOFP5 FvH4\_3g01350.t1

ATGAAATCCTCCAGGCAGCACAGAAGCAACCGCAGCTGAATCGTAGAGCTCCGATTCCGGGCATTGTGTTGCAGTAGCT  
GCAGGCTCAGCGTGTCTTCGTCTTCCGAGCAGGAAGTAGAGAGTTCAGCACTTCTGATCGTAACAGGTATCCATCTAT  
ATCAAGCATAGCGCATGCCATGGTTCAAGAGAGACTAGATCAGGTGATTAGAGAGAGGCAGGAGGAGGCCACGAGA  
GCGCATGTGGATCGTCGGAGAAGAAAGAACAAAGCAATATATGATGATCGAGCACAAAGGAACGGGGACTAAATTTGTGG  
TAATGGTTGCGATGGAAAAGTGTTCCTATGATCCGAGAGAAGATTTTAGGGAGTCCATGGAGGAAATGATAATGGCAAA  
ACGGATTGAAGAGCCAAAGGATCTTCGTAGCCTCTTGAATTACTACGTTTCGATGAATTCAGAGGAGTATCATGAGATT  
ATACTCGAGGTGTTTCATGAAGTTTGCTCTGATTTATTCCTATGTAAATGTCATTGA

>FvOFP6 FvH4\_3g07180.t1

ATGAAGTGGGGTAGTAGCAGAAACAAAAGCCTCCACCTTCCTTTTCTGCTTCTTCTTCTACTACTTCTAAGCCATCCT  
TGATCTCCCATGTCTTTCCAAGTTCATGGCTTTCGAAGTTTAAGCAAAAGACTGGCAATTCAGAGCCAAAACCCGGTAA  
AGTAAATCAAAAAGGGAAGAGGAATTCTCCGTCTTTGAGTAGTTCACCTAGGATTGCTAGGGAGGGTGGTGGTAGATTC  
TATGGTGATGATGATGGTGATGATGGATATTGGAGGCTGTCTTTTGGTGAGGACAGTGTTGAAGGAGAGAAGAAGAGTA  
GAGGTGTGTTACGATCGGTTCCGTATGAATCTGAGGAAGAGTTTGAAGCTAGGCCCTCGAAGGTGACAGGCATGAGTAA  
AGGTGGGAATGCTGAAGAAAGGAAGTTGAGGAAAGGAAATGAAGGAGTTACAGGGAAGAAGAGGTTAGAATTAAGGA  
GAAGCAGAGGAACCAGAAGAGAGATCAAGCAAAACAGGAGAAGAGGATGATGTGTTGGAATGTTAGCAGCAAGAATAA  
TTTTGACAAAGGAGAAGGATAGTAACAAGCATGGATTAACCTTCTGGTGCAAGGAAATATCGATATGCTTCTTCAAATCT  
GAAACAATTGAAGAAGAAGTTTCTGAAGAAAAGCCGACTTCAGATTGGCAGAAGTTGAAGGAAATGAAGATACAAGAG  
GTGATGGCAAAGAGTGAGAAACACAGGAAATCTGTCTACATAAGCAGAGACTTGCAGAGGAAATCAAGACCAAAGCGGA  
GTAACAAAGTCAGAGTTTGCTCTCCAAGAACAGCATCAAGAGTTGAAATCTGCAAAATCAAAGCTCTCCAAGACATGGC  
GAAAGCAAAAAGGCAGCAAAGGAGAGAAAGGTGCAGCAGGTGAGAACAGGCTTGATAGCTTTGCAGTGGTGAAGTGC  
TCATTCGACCCACAACAGGACTTCAGAGATTCCATGGTTGAGATGATTGTGGAGAAGAAGCTAACTCGGCCAGATGATC  
TTGAAGAGCTCTTAGCTTGTTACCTGACACTGAATTCTGATGAATACCATGATCTCATCATCAAGGTATTCCGGCAGGT  
GTGGTTTGATTTGAATCAAACCTATTTTGGTAGTGAATTACAGAATGATCAATGTTGCAATGACTGA

>FvOFP7 FvH4\_3g25970.t1

ATGTCTTCTACAAAAAGACCAAGTTTCTGAAAACCTAGTCACATCCAACATTAGAGGCTGCGGTTGTGGAAGACCAA  
AGCTCTCGGACGTTTACGAGCCAACGCAAAACCCAAAATCCCCATTTGCAAAATAAACTCAAATCACCAAATACCCCA  
TTCCTCTTCAAGCTCTTGTGACATGAGAAACGGAAGTTTCACAGTCGACGAAGATGACGAAGATCAGTGCACCTCCACC  
ACCATCTCATTCAACAACGACTCAACAGTATCCTCATCCCAACCTTCAGATTTCAGCAGAGATTCACTGTTCCAACAAGT  
CAAAGCCTCCAATCCCACCGCAGACCAAAATCGACAACAGCATTGCCGTGGTAAAAGATTCCGACAACCCCTTATCAGGA  
TTTCCGGCGGTCCATGCTTCAGATGATCGTAGAGAAAGAGATATACTCCAAGGAGGAACTCCAGGAGCTTCTGAGCTGC  
TTCCTCGAGCTCAATTCTAGACATCACCATGATGTTATCATTCAAGCTTTCACAGAAATCTGGAATGGTGATCTGGTTG  
ACATTGCGAGGAAAAGAAGCGTACGTGTGAATCCCAGATGTGGAACGTGTGAAGATCATAAGCCATGTGAGGCATTGAA  
TTGA

>FvOFP8 FvH4\_3g40310.t1

ATGGGTAACACTACAGGTTTCAGATTGGCAGATATGATACCAAATGCCTGGTTTTACAAGCTTACAGATATGAGCAAAACCA  
GAAAACACAACACTACTTCTCCCAAGAAAAAACCAACCTCTTCATTCCCACCACAAAGAACCACCCATCTTTCACA  
AACCAGATACTCCTACTACATCACAACAGACCAACAACCAACAGAGATGAAAGGTTCTTCTACAATTCACCTACATGC  
CCCAAAGGCTCAGATACAAATTTCCAGAACAACCAAGAAGGTCATCCACTAAAAGAAGCAGAAGGAAAGCTGTTTACA  
GGCCTTCTCCTAAGAAACATGTCATTTCTCCTCTGTTTCATCAGGCCATTGTAGCTGTCAATGTCATGCCTCAACTCC  
TGAGTCTCTTGACTACTTTGGCTCATCTTCAAGTGAGAGAAATCCACTGAAACTCATGACTTTCATGAATTGATTCCA  
TCCGAGTTCGAAAGCGACCAAGTTGGGTGCTAGTGAGTTTGGCTCTTATAGCTGCAGAGTAAGTTCTTCAACTCTGATA  
CTATCATTGACAAGAAAAAGAAGGCTCAACCAACAAAGTCCATGATCGGTTTGACATGATCTCGGAGTTAGAGCTTCC  
TCCAATCTTGACAAAGCCAACGAAGCTTGATGATCGTAGTAAGGCCATTGAGTCCACCAAGTTCAGGAAGAGTACGTCA  
TCCAAATTGAAGGAAACAAAGGGCACCAGTCTCTTTCTGTGAAGATTGTCAAGGAAGAAAGAAGCAGTAGTAGGATAC  
AGAAGGACCAAAAGACAGCAGCTCCTTACGTTCGGAACCTCGTCTGCTTCTCCAACCGGCATAAGGCTTCGAGGCAACTC  
TCCGAGACTAGCAAGCAAGAAACTTCAGCAGCCCTTTGGTAGTAAAAAGAGTGTGTCAAAGAATAGAGGAGGCATTTG  
GACAGCTTTGCAGTTGTGAAGTCTCACTTGACCCTCAGAGGGACTTCAAGGACTCAATGAGGGAGATGATCATGGAGA  
ATAACATCAAGGAATCTAAGGATTTGGAAGACCTCCTTGCTTGTTATCTTTCACTCAACTCAAGGAATACCATGATCT  
CATTGTCAAGGCTTTCGAGCAAATCTGGTTCGATATGGCTCGCATTTAAATCTGA

>FvOFP9 FvH4\_4g15660.t1

ATGTCCAAACTCCCATGGAAGAAGAATCTCCACCTCTGCCTCCCCAATTTCAAATGCCTACCCTTAATCACCCAAAAC  
CACCTCAACCCTCCGACCATGACCACCCTCACCCAAACCCACCACTCATGATACCAACAACATCAACAGCCTCTATCA  
TCACGACTCCAACCTCCTCAGATCAATCCACCTCCAAATCCCTCACCGCTCCGACGACTTCTTCTACTCTTCTCCTCC  
GACTCCGAAGCCGCCACTGACTCCCCACCTGACTTTGCCACCGTCTTCGCCTCCCAACGCTTCTTCTCTCCTCCCCG  
GTCGCTCCAACCTCCATCGTCGAGTCCCCGGACACCAAAACCAACTGCAACGATTCCCTTCGTCACCAGAGGCGTTACTGT  
TGCCAAGTACTCCTCGAATCCTTACTTGATTTCGAAAAATCCATGGAGGAGATGCTCGAAGCTAGAGATAGAGATCAT

ATAGACAACAAAGATAGAAATCACAATGTGGTGATGTGTTGAAAAGCGACTTGATTATCTACACGAGCTGCTCTTGT  
GCTACCTTCAGTTAAATCCCGGAGACGCCACAAGGACATTATCAGTGCCTTCACAGACCTTGTCATTTGCATATTGTC  
AGCTAATCCGGCAGCTTCAACATCATCGTCGGCCGATGACGATCACATAAAAGAAGAGAAGGAGGAGATTACAGCGCAA  
TGTGCGTCGTAA

>FvOFP 10 FvH4\_6g10140.t1

ATGGGTAAGTACAAGTTTAGATTATCCGATATGATACCCAATGCCTGGTTTTACAAGCTCAAAGACATGAGCAAAACCA  
GAAAGAACCAGAGCAGCAATTCTCATCCCAAGAAGAGAAACCAACCACCACCATCCACATTTGCTTCTTCAGCAAAACC  
AACAAGCCCAGCAAAGCCAAAGCAGGTCACCCATCACAACCACCATTGTCATCACTCAAGAAAGTCGTACTACTTCACA  
AGGGAGCTGAATAACTCCACAGGTGAGAACAGACCACTGTGCAACACCCCTGTAAACCCCAAAGTCTCCACCACCAATT  
TGACTCATGAGCCACCAAGAAAATCTTCTATACAAAAACAGAGGAAGAGTTCTAATTCCAAGCTTGCCATGTCGACTAG  
CTCCTCTGTTTCTGCAGGGTGTGCGGCCCTCCATCGAATCCGTCTGGACCAAATCGGATTCTCTACCGGAGGAACAGCTC  
TGGTCTACTTCTTCGTCTCTCGACAGCTCCGAGCTTGAGTTTCATCACACCGACTCTCTTGAATTCAGATGTGACCGTA  
TTCTTGCTACAGAGACATTTGATGGTATGAATTCTATGACGAGTTCTAATGAGAAAGACATCATCATCGACGTGGACAA  
CTCCTCTGAGAAGAAGAACTTGATTCTGTTCTCTGATCTTGAGCTTCCTCGGATTATAACCAAGCCGGAAAGCTTCAAT  
GAAATGGTGTGTGAGGTCAAGAAGAAGAAGAAAGAGAACAAGGAGCAGCAGCCAATCAAATCCAGGAAAAGCTCACATG  
GATCAGAGAACAACAAAGAGCATCGTACGAGTTCTGTTAGAAGAGTTACTTCGAGCACTTCACCGGGAGTTAAGCTTCG  
GACTAATTCTCCGAGAATTGCAAACCGGAAAATAAACAGGCCAAAGTCGGACGCCGGAGTCTGTCTCGAATTTCGAGC  
TCAAAGAGGAGGAGTCTCTCGGAAAGCTTTGCAATTGTCAAGTCCTCATTTGATCCTCAAAGGGATTTTCAGGGAATCAA  
TGATAGAGATGATCATGGAGAACAACATCAAGGCATCGAAGGACTTGGAAGATCTTCTTGATGTTATCTTTCTCTGAA  
TGCAAATGAATACCATGAGCTCATCATCAAGGTCTTCAAGCAAATCTGGTTTGATCTCACTGACATCCAGTCAAAAGGT  
TTCTCTGGCAGTTCGTTCTTCAGCACTCCCATTCTGGAAGCTCTACCTTTGGAGGTAA

>FvOFP11 FvH4\_6g19870.t1

ATGAAGCTTCTTCTTCTTCTCTGTTCAAGAACACAGCACCAGCACCAGAGCCAAAGTCTTCTTCTTCTTCTTGGCCCT  
GGCCTTCTTGTACCCAAACCAGGACCATCTCCTTCAGAATTCCTCGGAAACGATATGTTCAAGACCATAAACTCGGCTTA  
CTTCGACACCAACACACCGGAATCCTTCTTCACCAACTCCTCCGAGGGGTGTGCGAGTTTCTCCACAACAGTGTCTGAA  
GAAGACTCCTCGGGCGGAGGAGGAGATCCGATAGAGACTGTGATCAACAAAGGGTTGAGATCAGAGCGGCTCTTCTTCG  
ATCCTGGTGAGACCAGCTCTATTTAGACAAGGACTCTATCAAGGCTCGTGAAGAAGAAGAAGAAGAAGAAGACGA  
TGATGGGGTTGATGATGAACCTTGCTGGTGGTGATGATAACATTCCGTTCAAAGAGAGTGTGGCTTTGTCCATGGACTCG  
CCGACCCCTTATGTGGATTTTCAGAAAATCCATGGAGGAAATGGTGAAGCTCATGGTTTGAAGGACTGGGAACATCTTG  
AAGAGCTTCTGTGTTGGTATTTGCGGGTCAATGGAAAATCAAACCATGGATATATAGTTGGAGCTTTCGTTGATCTTTT  
GGTAGGTCTCGCATTAGCACTAGCATTCCTCCTCTTCTGTTTCATGTAGTGAGTACTCTCCTTCTACTCCTTTGTCT  
TTTTACACCAGTACTACTTCCTGTTTCATCTTCTTCTACCTCCACTCCTTGTGTGTCCTCCATTGGACCCGAGGACGGAT  
CAGAAATGAGTACCAGCACCATTCCCTATTTGTCTTCCCTGTTAGAAGCTGAGGAAGAGATTAACGAAGAAGATGACGA

TGATGATGATGGTGCTTCATCTTAG

>FvOFP12 FvH4\_6g19871.t1

ATGAGCCTTCCTTCACGTGAGACTATCAGCCTGTCATTAAAGAGAAAAACAAGAGCTGTAATCATAGCAAGCACAGGGA  
CCCCTCAGGAGAGCAGCGGAGAGCTCACATGCACGCTTTTATATACTCACTCCCATCACTCCCCCCCACACCCTTCTTC  
ATCCTCATCCCAACTCTCACTCTTCTTCTTCTTCTTCTTCTTCTTCTTCTTCTTCTTCTTCTTCTTCTGCTTCACTCCTTCACCAACA  
ATGCCTACCATAACCAGAAAGAAGCTCCTCAACACTGTCACCGCCGTCGACATAGGCTGCAGCAGCTGCAGAAGACCAA  
GGCTCTTCCATATGTTCCGCAATAAAGCCAAGCCCGTCACCACCAAGTTCGGCGGTCGAAACAAAGCCACCACAACCTA  
CTCTTCTGCTTCGAGCTCCTACAACAAAGACTCCTCCACCACCACCACATTCTCCCCAACACCGACGACTACGCTTCG  
TTTTCCGACCACGAGACCGTCGCCAAGACCGCCACGCCCGTCAAGGGGTTGCGGAGAGTTGGCGGGGAGAGCGTTGCGG  
TGGAGAAAGACTCCGGCGACCCTTACTTGGACTTCAGGCATTCCATGCTTCAGATGATTTTGGAGAACGAGATATACTC  
GAAAGATGATCTCCGGGAGCTTCTCAACTGTTTCTGCAGCTCAATGCTCCCTGCAACCATGGCATAATCATCAGGGCT  
TTCAGTGACATCTGGAATGGAGTCTTCTCGGTTAGGTCTAGTGCTGCCACAATGCAGCTTCGTCTTGCTCGCAAGTCAC  
GTGACTACTAG

>FvOFP13 FvH4\_6g31210.t1

ATGACCAAGAAACTCCAAAAGCGTCTCCAAGATTACCTCACCAAGATTAAGAAACCTTCCCCTGCTTTGATCCCAATCC  
CCTCTAAGAAATGGATGCGAACCTGTAAACACCCCCAAAACCTATCTTTCGCTATCAACAACACTGAGACGACTCAAGA  
CAAAGATGATGATGCTGCAACACTCTCAGATATCGATGAGTTTCTCTTCGAGAATTCAGGTCTCTCTACCTAAGAGAC  
GATGATCAAGGAGCTGACACCACCGACGAGAACGAAAGAAAAAGAGAAGAGAAAACCTAGAAATGAAACAAGGCCATG  
AAAAGGAAAGTGCAAACGAGCCCTTTTGGGATAAACCTCTACACCTGAAGAAACGAGTCTCTGATCAACATGAAACCA  
AAACCAAGATGGGTTTCTGTTTCGAGTCCCCTCGACTGAATATTGATCCACCGGCGGCGGATCTCTGTAGCTCACACAGG  
TTTTCAGTGTCCTCCGGGTCGACTGTCAAGCTCCGTCCGACTAGCACAAACCACCTACGACATCTGAGGACGAGGAT  
CCAGCTCTATGACGTCAACACGAACCCTAAACGTCGACTCTCCTACCACATCACATTCTAATAACAACGATCACCATGT  
GGCACTTCCGACTGACTGTATCTCAGTCTTGATGTACTCTCCAACCGGGCTACGAGTTTAAAGATCCATGCATGAC  
ATGGTTGAAGCTCGCCTCAGAAACAATGCAAAGGTAGACTGGAATTTTCATGGAGGAGCTTCTGTTTTGTTATCTCAATC  
TCAACAAGAAGAAGTCCACAGGTTCACTAGCGCTTTCGCGGATTTGGTCGTGGACATGCGTCAGGATTCTGACAC  
CGTTCTGGAGAGATCACGGAAACTTTGA

>FvOFP14 FvH4\_7g33090.t1

ATGGATCATGTCACTGAGGAACAAAACAGGAGGAGAAGGAAGAAAGAGATCTTGACAGAGTCGGAGCGGCAAATTTAGCT  
TTTCGGCTAGGTTGCCTGACGATGTTTCATGGTGTTTTTCCGGTAGTATGTGTTTGGTAAAGTACACAACAGACCCACT  
CCTTGATATAAGAGAGTCAATACTGGAGATGCTTCAGTATGCTCAAGGGGTTTGTGATTGGAATGATGTTGAGGAGTTA  
GTTTACTGTTACATTCTCTCAACTCTTCAGAAGTCCATGAAGTGGTTGGACAAGCTTTTCTCAGTTTATGTTCCAGTT  
AA
